# Supplementary material for: Two Important Anticancer Mechanisms of Natural and Synthetic Chalcones
Source: MDPI journal article supplement (doi:10.3390/ijms231911595), 2022-09-30
Supplement: s1 [file s1]

| Table S1. Chemical structures of flavonoids |                                                                                     |                            |
|---------------------------------------------|-------------------------------------------------------------------------------------|----------------------------|
|                                             | Structure                                                                           | Name                       |
| 1                                           | 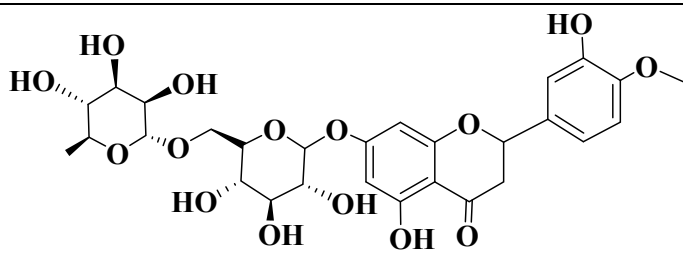   | Hesperidin                 |
| 2                                           |    | Hesperidin methyl chalcone |
| 3                                           |   | Flavokawain A              |
| 4                                           |  | Flavokawain B              |
| 5                                           |  | Flavokawain C              |
| 6                                           |  | Millepachine               |
| 7                                           |  | Xanthohumol                |

|       |                                                                                     |                                                                                                              |
|-------|-------------------------------------------------------------------------------------|--------------------------------------------------------------------------------------------------------------|
| 8     | 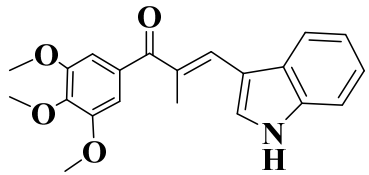   |                                                                                                              |
| 9     |    | Licochalcone A                                                                                               |
| 10    |    | Licochalcone B                                                                                               |
| 11    |    | Echinatin                                                                                                    |
| 12    |   | Isoliquiritin                                                                                                |
| 13    |  | Isoliquiritigenin                                                                                            |
| 14-57 |  | 14. R <sub>1</sub> , R <sub>3</sub> =OMe                                                                     |
|       |                                                                                     | 15. R <sub>1</sub> , R <sub>3</sub> , R <sub>4</sub> =OMe                                                    |
|       |                                                                                     | 16. R <sub>1</sub> , R <sub>3</sub> , R <sub>5</sub> =OMe                                                    |
|       |                                                                                     | 17. R <sub>1</sub> , R <sub>3</sub> , R <sub>8</sub> =OMe                                                    |
|       |                                                                                     | 18. R <sub>1</sub> , R <sub>3</sub> , R <sub>4</sub> , R <sub>6</sub> , R <sub>8</sub> =OMe                  |
|       |                                                                                     | 19. R <sub>1</sub> , R <sub>3</sub> , R <sub>6</sub> , R <sub>7</sub> , R <sub>8</sub> =OMe                  |
|       |                                                                                     | 20. R <sub>1</sub> , R <sub>3</sub> , R <sub>5</sub> , R <sub>6</sub> , R <sub>8</sub> =OMe                  |
|       |                                                                                     | 21. R <sub>1</sub> , R <sub>3</sub> , R <sub>5</sub> , R <sub>6</sub> , R <sub>7</sub> =OMe                  |
|       |                                                                                     | 22. R <sub>1</sub> , R <sub>3</sub> =OEt, R <sub>4</sub> , R <sub>6</sub> , R <sub>8</sub> =OMe              |
|       |                                                                                     | 23. R <sub>1</sub> , R <sub>3</sub> =OEt, R <sub>4</sub> , R <sub>8</sub> =OMe                               |
|       |                                                                                     | 24. R <sub>1</sub> , R <sub>3</sub> =OEt, R <sub>4</sub> , R <sub>6</sub> =OMe                               |
|       |                                                                                     | 25. R <sub>1</sub> , R <sub>2</sub> , R <sub>6</sub> , R <sub>8</sub> =OMe                                   |
|       |                                                                                     | 26. R <sub>1</sub> , R <sub>2</sub> , R <sub>3</sub> , R <sub>4</sub> , R <sub>6</sub> , R <sub>8</sub> =OMe |
|       |                                                                                     | 27. R <sub>1</sub> , R <sub>2</sub> , R <sub>3</sub> , R <sub>4</sub> , R <sub>6</sub> =OMe                  |
|       |                                                                                     | 28. R <sub>1</sub> , R <sub>2</sub> , R <sub>3</sub> , R <sub>4</sub> , R <sub>8</sub> =OMe                  |
|       |                                                                                     | 29. R <sub>1</sub> , R <sub>2</sub> , R <sub>3</sub> , R <sub>4</sub> , R <sub>8</sub> =OEt                  |

|                                                                                     |                                                                                     |                                                                                                                 |
|-------------------------------------------------------------------------------------|-------------------------------------------------------------------------------------|-----------------------------------------------------------------------------------------------------------------|
|                                                                                     |                                                                                     | 30. R <sub>4</sub> , R <sub>8</sub> =OMe                                                                        |
|                                                                                     |                                                                                     | 31. R <sub>1</sub> =OH, R <sub>2</sub> , R <sub>5</sub> , R <sub>7</sub> =OMe                                   |
|                                                                                     |                                                                                     | 32. R <sub>1</sub> =OH, R <sub>2</sub> , R <sub>6</sub> , R <sub>7</sub> ,R <sub>8</sub> =OMe                   |
|                                                                                     |                                                                                     | 33. R <sub>1</sub> =OH, R <sub>2</sub> , R <sub>6</sub> , R <sub>7</sub> =OMe                                   |
|                                                                                     |                                                                                     | 34. R <sub>1</sub> =OH, R <sub>2</sub> , R <sub>4</sub> ,R <sub>6</sub> , R <sub>8</sub> =OMe                   |
|                                                                                     |                                                                                     | 35. R <sub>1</sub> =OH, R <sub>2</sub> , R <sub>7</sub> , R <sub>8</sub> =OMe                                   |
|                                                                                     |                                                                                     | 36. R <sub>1</sub> =OH, R <sub>2</sub> , R <sub>5</sub> , R <sub>8</sub> =OMe                                   |
|                                                                                     |                                                                                     | 37. R <sub>1</sub> =OH, R <sub>2</sub> , R <sub>5</sub> ,R <sub>6</sub> , R <sub>7</sub> =OMe                   |
|                                                                                     |                                                                                     | 38. R <sub>1</sub> =OH, R <sub>2</sub> , R <sub>4</sub> , R <sub>8</sub> =OMe                                   |
|                                                                                     |                                                                                     | 39. R <sub>1</sub> =OH, R <sub>2</sub> , R <sub>6</sub> , R <sub>8</sub> =OMe                                   |
|                                                                                     |                                                                                     | 40. R <sub>3</sub> =OH, R <sub>1</sub> , R <sub>2</sub> , R <sub>4</sub> , R <sub>8</sub> =OMe                  |
|                                                                                     |                                                                                     | 41. R <sub>3</sub> =OH, R <sub>1</sub> , R <sub>2</sub> , R <sub>5</sub> , R <sub>7</sub> =OMe                  |
|                                                                                     |                                                                                     | 42. R <sub>3</sub> =OH, R <sub>1</sub> , R <sub>2</sub> =OMe                                                    |
|                                                                                     |                                                                                     | 43. R <sub>3</sub> =OH, R <sub>1</sub> , R <sub>2</sub> , R <sub>4</sub> =OMe                                   |
|                                                                                     |                                                                                     | 44. R <sub>3</sub> =OH, R <sub>1</sub> , R <sub>2</sub> , R <sub>5</sub> =OMe                                   |
|                                                                                     |                                                                                     | 45. R <sub>3</sub> =OH, R <sub>1</sub> , R <sub>2</sub> , R <sub>4</sub> , R <sub>6</sub> =OMe                  |
|                                                                                     |                                                                                     | 46. R <sub>3</sub> =OH, R <sub>1</sub> , R <sub>2</sub> , R <sub>5</sub> , R <sub>6</sub> , R <sub>7</sub> =OMe |
|                                                                                     |                                                                                     | 47. R <sub>3</sub> =OH, R <sub>1</sub> , R <sub>2</sub> , R <sub>6</sub> , R <sub>7</sub> , R <sub>8</sub> =OMe |
| 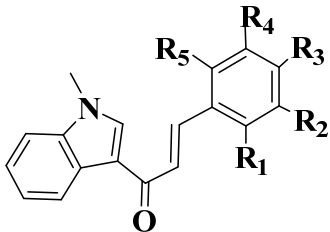 |                                                                                     | 48. R <sub>1</sub> ,R <sub>3</sub> =OMe                                                                         |
|                                                                                     |                                                                                     | 49. R <sub>2</sub> ,R <sub>3</sub> ,R <sub>4</sub> =OMe                                                         |
|                                                                                     |                                                                                     | 50. R <sub>1</sub> ,R <sub>3</sub> ,R <sub>5</sub> =OMe                                                         |
|                                                                                     |                                                                                     | 51. R <sub>1</sub> ,R <sub>5</sub> =OMe                                                                         |
|                                                                                     |  | 52                                                                                                              |
|  |                                                                                     | 53. R <sub>1</sub> ,R <sub>3</sub> =OMe                                                                         |
|                                                                                     |                                                                                     | 54. R <sub>3</sub> =OMe                                                                                         |
|                                                                                     |                                                                                     | 55. R <sub>1</sub> ,R <sub>3</sub> ,R <sub>5</sub> =OMe                                                         |
|                                                                                     |                                                                                     | 56. R <sub>1</sub> , R <sub>5</sub> =OMe                                                                        |
|                                                                                     |  | 57.                                                                                                             |

|       |                                                                                     |                                                                              |
|-------|-------------------------------------------------------------------------------------|------------------------------------------------------------------------------|
| 58-61 | 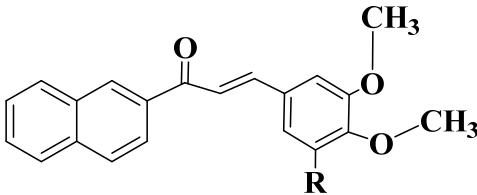   | 58. R=Cl                                                                     |
|       |                                                                                     | 59. R=Br                                                                     |
|       |                                                                                     | 60. R=I                                                                      |
|       |                                                                                     | 61. R=OMe                                                                    |
| 62-83 |    | 62. R <sub>1</sub> , R <sub>2</sub> =H; R <sub>3</sub> , R <sub>4</sub> =OMe |
|       |                                                                                     | 63. R <sub>1</sub> , R <sub>2</sub> , R <sub>4</sub> =H; R <sub>3</sub> =OMe |
|       |                                                                                     | 64. R <sub>1</sub> , R <sub>2</sub> , R <sub>3</sub> , R <sub>4</sub> =OMe   |
|       |                                                                                     | 65. R <sub>1</sub> , R <sub>2</sub> , R <sub>3</sub> =OMe; R <sub>4</sub> =H |
|       |    | 66. R <sub>1</sub> , R <sub>2</sub> =H; R <sub>3</sub> , R <sub>4</sub> =OMe |
|       |                                                                                     | 67. R <sub>1</sub> , R <sub>2</sub> , R <sub>4</sub> =H; R <sub>3</sub> =OMe |
|       |                                                                                     | 68. R <sub>1</sub> , R <sub>2</sub> , R <sub>3</sub> =H; R <sub>4</sub> =OMe |
|       |                                                                                     | 69. R <sub>1</sub> , R <sub>2</sub> , R <sub>3</sub> , R <sub>4</sub> =OMe   |
|       |                                                                                     | 70. R <sub>1</sub> , R <sub>2</sub> , R <sub>3</sub> =OMe; R <sub>4</sub> =H |
|       |                                                                                     | 71. R <sub>1</sub> , R <sub>2</sub> , R <sub>4</sub> =OMe; R <sub>3</sub> =H |
|       |   | 72. R <sub>1</sub> , R <sub>2</sub> =H; R <sub>3</sub> , R <sub>4</sub> =OMe |
|       |                                                                                     | 73. R <sub>1</sub> , R <sub>2</sub> , R <sub>4</sub> =H; R <sub>3</sub> =OMe |
|       |                                                                                     | 74. R <sub>1</sub> , R <sub>2</sub> , R <sub>3</sub> , R <sub>4</sub> =OMe   |
|       |                                                                                     | 75. R <sub>1</sub> , R <sub>2</sub> , R <sub>3</sub> =OMe; R <sub>4</sub> =H |
|       |  | 76. R <sub>1</sub> , R <sub>2</sub> =H; R <sub>3</sub> , R <sub>4</sub> =OMe |
|       |                                                                                     | 77. R <sub>1</sub> , R <sub>2</sub> , R <sub>4</sub> =H; R <sub>3</sub> =OMe |
|       |                                                                                     | 78. R <sub>1</sub> , R <sub>2</sub> , R <sub>3</sub> =H; R <sub>4</sub> =OMe |
|       |                                                                                     | 79. R <sub>1</sub> , R <sub>2</sub> , R <sub>3</sub> , R <sub>4</sub> =H     |
|       |                                                                                     | 80. R <sub>1</sub> , R <sub>2</sub> , R <sub>3</sub> , R <sub>4</sub> =OMe   |
|       |                                                                                     | 81. R <sub>1</sub> , R <sub>2</sub> , R <sub>3</sub> =OMe; R <sub>4</sub> =H |
|       |                                                                                     | 82. R <sub>1</sub> , R <sub>2</sub> , R <sub>4</sub> =OMe; R <sub>3</sub> =H |
|       |                                                                                     | 83. R <sub>1</sub> , R <sub>2</sub> =OMe; R <sub>3</sub> , R <sub>4</sub> =H |
| 84-95 |  | 84. R=4-OMe                                                                  |
|       |                                                                                     | 85. R=2,5-diOMe                                                              |
|       |                                                                                     | 86. R=3,4-diOMe                                                              |
|       |                                                                                     | 87. R=2,4-diOMe                                                              |
|       |                                                                                     | 88. R=3,4,5-triOMe                                                           |
|       |                                                                                     | 89. R=3-OMe, 4-OH                                                            |
|       |                                                                                     | 90. R=2,4,5-triOMe                                                           |
|       |                                                                                     | 91. R=3,5-diOMe                                                              |
|       |                                                                                     | 92. R=2-OMe                                                                  |

|        |                                                                                     |                                                                                                  |
|--------|-------------------------------------------------------------------------------------|--------------------------------------------------------------------------------------------------|
|        |                                                                                     | 93. R=3,5-diOMe, 4-OH                                                                            |
|        |                                                                                     | 94. R=3-OMe                                                                                      |
|        |                                                                                     | 95. R=2,3,4-triOMe                                                                               |
|        |                                                                                     | 96. R <sub>1</sub> =Ph, R <sub>2</sub> =3,4-diOMe                                                |
| 96-131 | 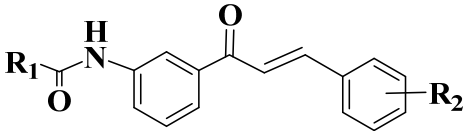   | 97. R <sub>1</sub> =4-O <sub>2</sub> NC <sub>6</sub> H <sub>4</sub> , R <sub>2</sub> =3,4-diOMe  |
|        |                                                                                     | 98. R <sub>1</sub> =3-BrC <sub>6</sub> H <sub>4</sub> , R <sub>2</sub> =3,4-diOMe                |
|        |                                                                                     | 99. R <sub>1</sub> =Ph, R <sub>2</sub> =3,4-diOMe                                                |
|        |    | 100. R <sub>1</sub> =2-O <sub>2</sub> NC <sub>6</sub> H <sub>4</sub> , R <sub>2</sub> =3,4-diOMe |
|        |                                                                                     | 101. R <sub>1</sub> =3-O <sub>2</sub> NC <sub>6</sub> H <sub>4</sub> , R <sub>2</sub> =3,4-diOMe |
|        |                                                                                     | 102. R <sub>1</sub> =4-O <sub>2</sub> NC <sub>6</sub> H <sub>4</sub> , R <sub>2</sub> =3,4-diOMe |
|        |                                                                                     | 103. R <sub>1</sub> =3-BrC <sub>6</sub> H <sub>4</sub> , R <sub>2</sub> =3,4-diOMe               |
|        |                                                                                     | 104. R <sub>1</sub> =4-BrC <sub>6</sub> H <sub>4</sub> , R <sub>2</sub> =3,4-diOMe               |
|        |                                                                                     | 105. R <sub>1</sub> =3-ClC <sub>6</sub> H <sub>4</sub> , R <sub>2</sub> =3,4-diOMe               |
|        |                                                                                     | 106. R <sub>1</sub> =4-ClC <sub>6</sub> H <sub>4</sub> , R <sub>2</sub> =3,4-diOMe               |
|        |                                                                                     | 107. R <sub>1</sub> =3,4-diClC <sub>6</sub> H <sub>4</sub> , R <sub>2</sub> =3,4-diOMe           |
|        |                                                                                     | 108. R <sub>1</sub> =2-FC <sub>6</sub> H <sub>4</sub> , R <sub>2</sub> =3,4-diOMe                |
|        |                                                                                     | 109. R <sub>1</sub> =4-NCC <sub>6</sub> H <sub>4</sub> , R <sub>2</sub> =3,4-diOMe               |
|        |                                                                                     | 110. R <sub>1</sub> =4-F <sub>3</sub> CC <sub>6</sub> H <sub>4</sub> , R <sub>2</sub> =3,4-diOMe |
|        |                                                                                     | 111. R <sub>1</sub> =2-MeOC <sub>6</sub> H <sub>4</sub> , R <sub>2</sub> =3,4-diOMe              |
|        |                                                                                     | 112. R <sub>1</sub> =3-MeOC <sub>6</sub> H <sub>4</sub> , R <sub>2</sub> =3,4-diOMe              |
|        |                                                                                     | 112. R <sub>1</sub> =4-MeOC <sub>6</sub> H <sub>4</sub> , R <sub>2</sub> =3,4-diOMe              |
|        |                                                                                     | 114. R <sub>1</sub> =3,4-diMeOC <sub>6</sub> H <sub>3</sub> , R <sub>2</sub> =3,4-diOMe          |
|        |  | 115. R <sub>1</sub> =3,4,5-triMeOC <sub>6</sub> H <sub>2</sub> , R <sub>2</sub> =3,4-diOMe       |
|        |                                                                                     | 116. R <sub>1</sub> =Ph, R <sub>2</sub> =3,4-diOMe                                               |
|        |                                                                                     | 117. R <sub>1</sub> =3-ClC <sub>6</sub> H <sub>4</sub> , R <sub>2</sub> =3,4-diOMe               |
|        |                                                                                     | 118. R <sub>1</sub> =4-ClC <sub>6</sub> H <sub>4</sub> , R <sub>2</sub> =3,4-diOMe               |
|        |                                                                                     | 119. R <sub>1</sub> =2-O <sub>2</sub> NC <sub>6</sub> H <sub>4</sub> , R <sub>2</sub> =3,4-      |

|           |                                                                                     |                                                                                                              |
|-----------|-------------------------------------------------------------------------------------|--------------------------------------------------------------------------------------------------------------|
|           |                                                                                     | diOMe                                                                                                        |
|           |                                                                                     | 120. R <sub>1</sub> =3-O <sub>2</sub> NC <sub>6</sub> H <sub>4</sub> , R <sub>2</sub> =3,4-diOMe             |
|           |                                                                                     | 121. R <sub>1</sub> =2-MeOC <sub>6</sub> H <sub>4</sub> , R <sub>2</sub> =3,4-diOMe                          |
|           |                                                                                     | 122. R <sub>1</sub> =3-MeOC <sub>6</sub> H <sub>4</sub> , R <sub>2</sub> =3,4-diOMe                          |
|           |                                                                                     | 123. R <sub>1</sub> =3-quinalinyl, R <sub>2</sub> =3,4-diOMe                                                 |
|           |                                                                                     | 124. R <sub>1</sub> =1-naphtyl, R <sub>2</sub> =3,4-diOMe                                                    |
|           |                                                                                     | 125. R <sub>1</sub> =3-pyridil, R <sub>2</sub> =3,4-diOMe                                                    |
|           |                                                                                     | 126. R <sub>1</sub> =7-methoxy-2-oxo-3-chromenyl, R <sub>2</sub> =3,4-diOMe                                  |
|           |                                                                                     | 127. R <sub>1</sub> =2-thienyl, R <sub>2</sub> =3,4-diOMe                                                    |
|           |                                                                                     | 128. R <sub>1</sub> =3-ClC <sub>6</sub> H <sub>4</sub> , R <sub>2</sub> =3-Cl                                |
|           |                                                                                     | 129. R <sub>1</sub> =3,4-diMeOC <sub>6</sub> H <sub>3</sub> , R <sub>2</sub> =3-Cl                           |
|           |                                                                                     | 130. R <sub>1</sub> =2-thienyl, R <sub>2</sub> =3-OMe, 4-F                                                   |
|           |                                                                                     | 131. R <sub>1</sub> =3-ClC <sub>6</sub> H <sub>4</sub> , R <sub>2</sub> =3-OMe, 4-F                          |
| 132 - 137 | 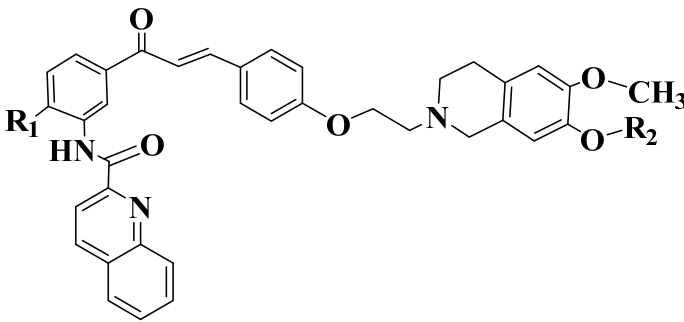 | 132. R <sub>1</sub> =H, R <sub>2</sub> =OMe                                                                  |
|           |                                                                                     | 133. R <sub>1</sub> =H, R <sub>2</sub> =-CH <sub>2</sub> -CH <sub>2</sub> -OCH <sub>3</sub> ;                |
|           |                                                                                     | 134. R <sub>1</sub> =H, R <sub>2</sub> =(CH <sub>2</sub> -CH <sub>2</sub> -O) <sub>3</sub> CH <sub>3</sub>   |
|           |                                                                                     | 135. R <sub>1</sub> =Me, R <sub>2</sub> =OMe;                                                                |
|           |                                                                                     | 136. R <sub>1</sub> =Me, R <sub>2</sub> =-CH <sub>2</sub> -CH <sub>2</sub> -OCH <sub>3</sub>                 |
|           |                                                                                     | 137. R <sub>1</sub> =Me, R <sub>2</sub> : (CH <sub>2</sub> -CH <sub>2</sub> -O) <sub>3</sub> CH <sub>3</sub> |
| 138       |  | 138                                                                                                          |
| 139       |  |                                                                                                              |

|                 |  |                                                                                                                                                                                                                                                                                                                                                                                                                                                                                                                                                                                           |
|-----------------|--|-------------------------------------------------------------------------------------------------------------------------------------------------------------------------------------------------------------------------------------------------------------------------------------------------------------------------------------------------------------------------------------------------------------------------------------------------------------------------------------------------------------------------------------------------------------------------------------------|
| 140             |  |                                                                                                                                                                                                                                                                                                                                                                                                                                                                                                                                                                                           |
| 141             |  |                                                                                                                                                                                                                                                                                                                                                                                                                                                                                                                                                                                           |
| 142<br>-<br>161 |  | 142.Ar=3-hydroxy-4-methoxyphenyl<br>143.Ar=4-bromophenyl<br>144.Ar=2,3,4-trimethoxyphenyl<br>145.Ar=2-bromophenyl<br>146.Ar=naphthalen-1-yl<br>147. Ar=naphthalen-2-yl<br>148.Ar=3-bromo-4-methoxyphenyl<br>149.Ar=3-methoxyphenyl<br>150.Ar=4-methoxy-3-nitrophenyl<br>151.Ar=thiophen-2-yl<br>152.Ar=4-chlorophenyl<br>153.Ar=2,4,5-trimethoxyphenyl<br>154.Ar=2-fluorophenyl<br>155.Ar=phenyl<br>156.Ar=3-fluorophenyl<br>157.Ar=3,4,5-trimethoxyphenyl<br>158.Ar=2-methoxyphenyl<br>159.Ar=4-(dimethylamino)phenyl<br>160.Ar=4-(diethylamino)phenyl<br>161.Ar=3-amino-4-methoxyphenyl |
| 162<br>-<br>177 |  | 162.Ar=4-chlorophenyl<br>163.Ar=4-methoxyphenyl<br>164.Ar=4-(diethylamino)phenyl<br>165. Ar=4-(dimethylamino)phenyl<br>166. Ar=3,4,5-trimethoxyphenyl<br>167.Ar=phenyl                                                                                                                                                                                                                                                                                                                                                                                                                    |

|                 |                                                                                     |                                   |
|-----------------|-------------------------------------------------------------------------------------|-----------------------------------|
|                 |                                                                                     | 168.Ar=2-fluorophenyl             |
|                 |                                                                                     | 169.Ar=naphtalen-1-yl             |
|                 |                                                                                     | 170.Ar=4-bromophenyl              |
|                 |                                                                                     | 171. Ar=4-fluorophenyl            |
|                 |                                                                                     | 172. Ar=3-fluorophenyl            |
|                 |                                                                                     | 173. Ar=2,3,4-trimethoxyphenyl    |
|                 |                                                                                     | 174.Ar=4-methoxy-3-nitrophenyl    |
|                 |                                                                                     | 175.Ar= naphtalen-2-yl            |
|                 |                                                                                     | 176.Ar=3-chlorophenyl             |
|                 |                                                                                     | 177.Ar=3-amino-4-methoxyphenyl    |
| 178             | 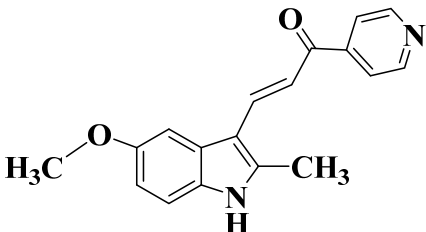   | 178                               |
| 179<br>-<br>187 |   | 179.R1=OH, R2=H, X=C              |
|                 |                                                                                     | 180.R1=F, R2=H, X=C               |
|                 |                                                                                     | 181.R1=H, R2=H, X=N               |
|                 |                                                                                     | 182.R1=NO2, R2=H, X=C             |
|                 |                                                                                     | 183.R1=NH2, R2=H, X=C             |
|                 |                                                                                     | 184.R1=OH, R2=CH3, X=C            |
|                 |                                                                                     | 185.R1=NH2, R2=CH3, X=C           |
|                 |                                                                                     | 186.R1=NH-Ser, R2=CH3, X=C        |
|                 |                                                                                     | 187.R1=NH-Pro-Lys, R2=CH3, X=C    |
| 188             |  |                                   |
| 189             |  |                                   |
| 190<br>-<br>214 |  | 190.R1=4-OMe, n=3, R2=piperidinyl |
|                 |                                                                                     | 191. R1=2-OH, n=3, R2=piperidinyl |
|                 |                                                                                     | 192. R1=4-Br, n=3, R2=piperidinyl |
|                 |                                                                                     | 193. R1=H, n=4, R2=piperidinyl    |



|  |  |                                                                                                |
|--|--|------------------------------------------------------------------------------------------------|
|  |  | 194. R <sub>1</sub> =4-Br, n=4,<br>R <sub>2</sub> =piperidinyl                                 |
|  |  | 195. R <sub>1</sub> =4-Cl, n=4,<br>R <sub>2</sub> =piperidinyl                                 |
|  |  | 196. R <sub>1</sub> =2,4-diCl, n=4,<br>R <sub>2</sub> =piperidinyl                             |
|  |  | 197. R <sub>1</sub> =4-OMe, n=2,<br>R <sub>2</sub> =morpholinyl                                |
|  |  | 198. R <sub>1</sub> =2-Br, n=2,<br>R <sub>2</sub> =morpholinyl                                 |
|  |  | 199. R <sub>1</sub> =2,4-diCl, n=2,<br>R <sub>2</sub> =morpholinyl                             |
|  |  | 200. R <sub>1</sub> =4-CF <sub>3</sub> , n=2,<br>R <sub>2</sub> =morpholinyl                   |
|  |  | 201. R <sub>1</sub> =4-OMe, n=3,<br>R <sub>2</sub> =morpholinyl                                |
|  |  | 202. R <sub>1</sub> =4-OMe, n=3, R <sub>2</sub> =2,6-<br>diOMe morpholinyl                     |
|  |  | 203. R <sub>1</sub> =2-OMe, n=3, R <sub>2</sub> =2,6-<br>diOMe morpholinyl                     |
|  |  | 204. R <sub>1</sub> =2,4-diCl, n=3, R <sub>2</sub> =2,6-<br>diOMe morpholinyl                  |
|  |  | 205. R <sub>1</sub> =4-Me, n=3, R <sub>2</sub> =2,6-<br>diOMe morpholinyl                      |
|  |  | 206. R <sub>1</sub> =4-OMe, n=3,<br>R <sub>2</sub> =indolinyl                                  |
|  |  | 207. R <sub>1</sub> =2,4-diCl, n=3,<br>R <sub>2</sub> =indolinyl                               |
|  |  | 208. R <sub>1</sub> =H, n=3, R <sub>2</sub> =1,2,3,4-<br>tetrahydroquinolinyl                  |
|  |  | 209. R <sub>1</sub> =4-OMe, n=3, R <sub>2</sub> =1,2,3,4-<br>tetrahydroquinolinyl              |
|  |  | 210. R <sub>1</sub> =4-Br, n=3, R <sub>2</sub> =1,2,3,4-<br>tetrahydroquinolinyl               |
|  |  | 211. R <sub>1</sub> =4-Cl, n=3, R <sub>2</sub> =1,2,3,4-<br>tetrahydroquinolinyl               |
|  |  | 212. R <sub>1</sub> =2,4-diCl, n=3,<br>R <sub>2</sub> =1,2,3,4-tetrahydroquinolinyl            |
|  |  | 213. R <sub>1</sub> =4-NH <sub>2</sub> , n=3, R <sub>2</sub> =1,2,3,4-<br>tetrahydroquinolinyl |
|  |  | 214. R <sub>1</sub> =4-OMe, n=3, R <sub>2</sub> =3,5-<br>diMe-1H-pyrazolyl                     |
|  |  |                                                                                                |

|                 |                                                                                    |                             |
|-----------------|------------------------------------------------------------------------------------|-----------------------------|
| 215<br>-<br>232 | 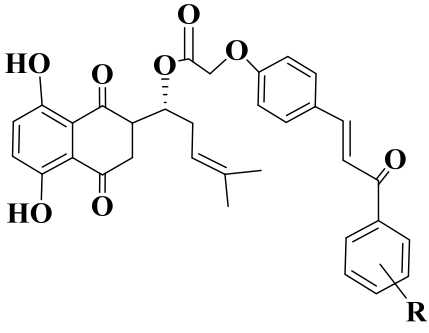  | 215.R=H                     |
|                 |                                                                                    | 216.R=4-OMe                 |
|                 |                                                                                    | 217.R=3,4,5-triOMe          |
|                 |                                                                                    | 218.R=4-CF <sub>3</sub>     |
|                 |                                                                                    | 219.R=2,3,4-triCl           |
|                 |                                                                                    | 220.R=2- CF <sub>3</sub>    |
|                 |                                                                                    | 221.R=2-OMe                 |
|                 |                                                                                    | 222.R=3- CF <sub>3</sub>    |
|                 |                                                                                    | 223.R=4-Et                  |
|                 |                                                                                    | 224.R=2-F                   |
|                 |                                                                                    | 225.R=3,5-diCF <sub>3</sub> |
|                 |                                                                                    | 226.R=3-OCF <sub>3</sub>    |
|                 |                                                                                    | 227.R=3-OMe                 |
|                 |                                                                                    | 228.R=2-Me                  |
|                 |                                                                                    | 229.R=2-Cl                  |
|                 |                                                                                    | 230.R=2-Br                  |
|                 |                                                                                    | 231.R=3-CH <sub>3</sub>     |
|                 |                                                                                    | 232.R=4- CH <sub>3</sub>    |
| 233             |  |                             |
