# Supplementary material for: Two Important Anticancer Mechanisms of Natural and Synthetic Chalcones
Source: MDPI journal article supplement (doi:10.3390/ijms231911595), 2022-09-30
Supplement: s1 [file s1]

| <b>Table S2.</b> The name and chemical formula of compounds |                                                                                                                                                                                                                                   |                                                 |
|-------------------------------------------------------------|-----------------------------------------------------------------------------------------------------------------------------------------------------------------------------------------------------------------------------------|-------------------------------------------------|
| Comp                                                        | Name                                                                                                                                                                                                                              | Chemical Formula                                |
| 1                                                           | 5-hydroxy-2-(3-hydroxy-4-methoxyphenyl)-7-(((3R,4S,5S,6S)-3,4,5-trihydroxy-6-(((2R,3R,4R,5R,6S)-3,4,5-trihydroxy-6-methyltetrahydro-2H-pyran-2-yl)oxy)methyl)tetrahydro-2H-pyran-2-yl)oxy)chroman-4-one                           | C <sub>28</sub> H <sub>34</sub> O <sub>15</sub> |
| 2                                                           | (E)-3-(3-hydroxy-4-methoxyphenyl)-1-(2-hydroxy-6-methoxy-4-(((3R,4S,5S,6S)-3,4,5-trihydroxy-6-(((2R,3R,4R,5R,6S)-3,4,5-trihydroxy-6-methyltetrahydro-2H-pyran-2-yl)oxy)methyl)tetrahydro-2H-pyran-2-yl)oxy)phenyl)prop-2-en-1-one | C <sub>29</sub> H <sub>36</sub> O <sub>15</sub> |
| 3                                                           | (E)-1-(2-hydroxy-4,6-dimethoxyphenyl)-3-(4-methoxyphenyl)prop-2-en-1-one                                                                                                                                                          | C <sub>18</sub> H <sub>18</sub> O <sub>5</sub>  |
| 4                                                           | (E)-1-(2-hydroxy-4,6-dimethoxyphenyl)-3-phenylprop-2-en-1-one                                                                                                                                                                     | C <sub>17</sub> H <sub>16</sub> O <sub>4</sub>  |
| 5                                                           | (E)-1-(2-hydroxy-4,6-dimethoxyphenyl)-3-(4-hydroxyphenyl)prop-2-en-1-one                                                                                                                                                          | C <sub>17</sub> H <sub>16</sub> O <sub>5</sub>  |
| 6                                                           | (E)-1-(5-methoxy-2,2-dimethyl-2H-chromen-8-yl)-3-(4-methoxyphenyl)prop-2-en-1-one                                                                                                                                                 | C <sub>22</sub> H <sub>22</sub> O <sub>4</sub>  |
| 7                                                           | (E)-1-(2,4-dihydroxy-6-methoxy-3-(3-methylbut-2-en-1-yl)phenyl)-3-(4-hydroxyphenyl)prop-2-en-1-one                                                                                                                                | C <sub>21</sub> H <sub>22</sub> O <sub>5</sub>  |
| 8                                                           | (E)-3-(1H-indol-3-yl)-2-methyl-1-(3,4,5-trimethoxyphenyl)prop-2-en-1-one                                                                                                                                                          | C <sub>21</sub> H <sub>21</sub> NO <sub>4</sub> |
| 9                                                           | (E)-3-(4-hydroxy-2-methoxy-5-(2-methylbut-3-en-2-yl)phenyl)-1-(4-hydroxyphenyl)prop-2-en-1-one                                                                                                                                    | C <sub>21</sub> H <sub>22</sub> O <sub>4</sub>  |
| 10                                                          | (E)-3-(3,4-dihydroxy-2-methoxyphenyl)-1-(4-hydroxyphenyl)prop-2-en-1-one                                                                                                                                                          | C <sub>16</sub> H <sub>14</sub> O <sub>5</sub>  |
| 11                                                          | (E)-3-(4-hydroxy-2-methoxyphenyl)-1-(4-hydroxyphenyl)prop-2-en-1-one                                                                                                                                                              | C <sub>16</sub> H <sub>14</sub> O <sub>4</sub>  |
| 12                                                          | (E)-1-(2,4-dihydroxyphenyl)-3-(4-(((2S,3R,4S,5S,6R)-3,4,5-trihydroxy-6-(hydroxymethyl)tetrahydro-2H-pyran-2-yl)oxy)phenyl)prop-2-en-1-one                                                                                         | C <sub>21</sub> H <sub>22</sub> O <sub>9</sub>  |
| 13                                                          | (E)-1-(2,4-dihydroxyphenyl)-3-(4-hydroxyphenyl)prop-2-en-1-one                                                                                                                                                                    | C <sub>15</sub> H <sub>12</sub> O <sub>4</sub>  |
| 14                                                          | (E)-1-(2,6-dimethoxyphenyl)-3-phenylprop-2-en-1-one                                                                                                                                                                               | C <sub>17</sub> H <sub>16</sub> O <sub>3</sub>  |
| 15                                                          | (E)-1-(2,6-dimethoxyphenyl)-3-(2-methoxyphenyl)prop-2-en-1-one                                                                                                                                                                    | C <sub>18</sub> H <sub>18</sub> O <sub>4</sub>  |
| 16                                                          | (E)-1-(2,6-dimethoxyphenyl)-3-(3-methoxyphenyl)prop-2-en-1-one                                                                                                                                                                    | C <sub>18</sub> H <sub>18</sub> O <sub>4</sub>  |
| 17                                                          | (E)-1-(2,6-dimethoxyphenyl)-3-(2-methoxyphenyl)prop-2-en-1-one                                                                                                                                                                    | C <sub>18</sub> H <sub>18</sub> O <sub>4</sub>  |
| 18                                                          | (E)-1-(2,6-dimethoxyphenyl)-3-(2,4,6-trimethoxyphenyl)prop-2-en-1-one                                                                                                                                                             | C <sub>20</sub> H <sub>22</sub> O <sub>6</sub>  |
| 19                                                          | (E)-1-(2,6-dimethoxyphenyl)-3-(2,3,4-trimethoxyphenyl)prop-2-en-1-one                                                                                                                                                             | C <sub>20</sub> H <sub>22</sub> O <sub>6</sub>  |

|    |                                                                              |                                                |
|----|------------------------------------------------------------------------------|------------------------------------------------|
| 20 | (E)-1-(2,6-dimethoxyphenyl)-3-(2,4,5-trimethoxyphenyl)prop-2-en-1-one        | C <sub>20</sub> H <sub>22</sub> O <sub>6</sub> |
| 21 | (E)-1-(2,6-dimethoxyphenyl)-3-(3,4,5-trimethoxyphenyl)prop-2-en-1-one        | C <sub>20</sub> H <sub>22</sub> O <sub>6</sub> |
| 22 | (E)-1-(2,6-diethoxyphenyl)-3-(2,4-dimethoxyphenyl)prop-2-en-1-one            | C <sub>21</sub> H <sub>24</sub> O <sub>5</sub> |
| 23 | (E)-1-(2,6-diethoxyphenyl)-3-(2,6-dimethoxyphenyl)prop-2-en-1-one            | C <sub>21</sub> H <sub>24</sub> O <sub>5</sub> |
| 24 | (E)-1-(2,6-diethoxyphenyl)-3-(2,4-dimethoxyphenyl)prop-2-en-1-one            | C <sub>21</sub> H <sub>24</sub> O <sub>5</sub> |
| 25 | (E)-1,3-bis(2,4-dimethoxyphenyl)prop-2-en-1-one                              | C <sub>19</sub> H <sub>20</sub> O <sub>5</sub> |
| 26 | (E)-1,3-bis(2,4,6-trimethoxyphenyl)prop-2-en-1-one                           | C <sub>21</sub> H <sub>24</sub> O <sub>7</sub> |
| 27 | (E)-3-(2,4-dimethoxyphenyl)-1-(2,4,6-trimethoxyphenyl)prop-2-en-1-one        | C <sub>20</sub> H <sub>22</sub> O <sub>6</sub> |
| 28 | (E)-3-(2,6-dimethoxyphenyl)-1-(2,4,6-trimethoxyphenyl)prop-2-en-1-one        | C <sub>20</sub> H <sub>22</sub> O <sub>6</sub> |
| 29 | (E)-3-(2,6-diethoxyphenyl)-1-(2,4,6-triethoxyphenyl)prop-2-en-1-one          | C <sub>25</sub> H <sub>32</sub> O <sub>6</sub> |
| 30 | (E)-3-(2,6-dimethoxyphenyl)-1-phenylprop-2-en-1-one                          | C <sub>17</sub> H <sub>16</sub> O <sub>3</sub> |
| 31 | (E)-3-(3,5-dimethoxyphenyl)-1-(2-hydroxy-4-methoxyphenyl)prop-2-en-1-one     | C <sub>18</sub> H <sub>18</sub> O <sub>5</sub> |
| 32 | (E)-1-(2-hydroxy-4-methoxyphenyl)-3-(2,3,4-trimethoxyphenyl)prop-2-en-1-one  | C <sub>19</sub> H <sub>20</sub> O <sub>6</sub> |
| 33 | (E)-3-(3,4-dimethoxyphenyl)-1-(2-hydroxy-4-methoxyphenyl)prop-2-en-1-one     | C <sub>18</sub> H <sub>18</sub> O <sub>5</sub> |
| 34 | (E)-1-(2-hydroxy-4-methoxyphenyl)-3-(2,4,6-trimethoxyphenyl)prop-2-en-1-one  | C <sub>19</sub> H <sub>20</sub> O <sub>6</sub> |
| 35 | (E)-3-(2,3-dimethoxyphenyl)-1-(2-hydroxy-4-methoxyphenyl)prop-2-en-1-one     | C <sub>18</sub> H <sub>18</sub> O <sub>5</sub> |
| 36 | (E)-3-(2,5-dimethoxyphenyl)-1-(2-hydroxy-4-methoxyphenyl)prop-2-en-1-one     | C <sub>18</sub> H <sub>18</sub> O <sub>5</sub> |
| 37 | (E)-1-(2-hydroxy-4-methoxyphenyl)-3-(3,4,5-trimethoxyphenyl)prop-2-en-1-one  | C <sub>19</sub> H <sub>20</sub> O <sub>6</sub> |
| 38 | (E)-3-(2,6-dimethoxyphenyl)-1-(2-hydroxy-4-methoxyphenyl)prop-2-en-1-one     | C <sub>18</sub> H <sub>18</sub> O <sub>5</sub> |
| 39 | (E)-3-(2,4-dimethoxyphenyl)-1-(2-hydroxy-4-methoxyphenyl)prop-2-en-1-one     | C <sub>18</sub> H <sub>18</sub> O <sub>5</sub> |
| 40 | (E)-3-(2,6-dimethoxyphenyl)-1-(2-hydroxy-4,6-dimethoxyphenyl)prop-2-en-1-one | C <sub>19</sub> H <sub>20</sub> O <sub>6</sub> |
| 41 | (E)-3-(3,5-dimethoxyphenyl)-1-(2-hydroxy-4,6-dimethoxyphenyl)prop-2-en-1-one | C <sub>19</sub> H <sub>20</sub> O <sub>6</sub> |
| 42 | (E)-1-(2-hydroxy-4,6-dimethoxyphenyl)-3-phenylprop-2-en-1-one                | C <sub>17</sub> H <sub>16</sub> O <sub>4</sub> |
| 43 | (E)-1-(2-hydroxy-4,6-dimethoxyphenyl)-3-(2-methoxyphenyl)prop-2-en-1-one     | C <sub>18</sub> H <sub>18</sub> O <sub>5</sub> |

|    |                                                                                              |                                                               |
|----|----------------------------------------------------------------------------------------------|---------------------------------------------------------------|
| 44 | (E)-1-(2-hydroxy-4,6-dimethoxyphenyl)-3-(3-methoxyphenyl)prop-2-en-1-one                     | C <sub>18</sub> H <sub>18</sub> O <sub>5</sub>                |
| 45 | (E)-3-(2,4-dimethoxyphenyl)-1-(2-hydroxy-4,6-dimethoxyphenyl)prop-2-en-1-one                 | C <sub>19</sub> H <sub>20</sub> O <sub>6</sub>                |
| 46 | (E)-1-(2-hydroxy-4,6-dimethoxyphenyl)-3-(2,3,4-trimethoxyphenyl)prop-2-en-1-one              | C <sub>20</sub> H <sub>22</sub> O <sub>7</sub>                |
| 47 | (E)-1-(2-hydroxy-4,6-dimethoxyphenyl)-3-(2,4,5-trimethoxyphenyl)prop-2-en-1-one              | C <sub>20</sub> H <sub>22</sub> O <sub>7</sub>                |
| 48 | (E)-3-(2,4-dimethoxyphenyl)-1-(1-methyl-1H-indol-3-yl)prop-2-en-1-one                        | C <sub>20</sub> H <sub>19</sub> NO <sub>3</sub>               |
| 49 | (E)-1-(1-methyl-1H-indol-3-yl)-3-(3,4,5-trimethoxyphenyl)prop-2-en-1-one                     | C <sub>21</sub> H <sub>21</sub> NO <sub>4</sub>               |
| 50 | (E)-1-(1-methyl-1H-indol-3-yl)-3-(2,4,6-trimethoxyphenyl)prop-2-en-1-one                     | C <sub>21</sub> H <sub>21</sub> NO <sub>4</sub>               |
| 51 | (E)-3-(2,6-dimethoxyphenyl)-1-(1-methyl-1H-indol-3-yl)prop-2-en-1-one                        | C <sub>20</sub> H <sub>19</sub> NO <sub>3</sub>               |
| 52 | (E)-1-(5-methoxy-1-methyl-1H-indol-3-yl)-3-(2,4,6-trimethoxyphenyl)prop-2-en-1-one           | C <sub>22</sub> H <sub>23</sub> NO <sub>5</sub>               |
| 53 | (E)-1-(2,4-dimethoxyphenyl)-3-(1-methyl-1H-indol-3-yl)prop-2-en-1-one                        | C <sub>20</sub> H <sub>19</sub> NO <sub>3</sub>               |
| 54 | (E)-1-(4-methoxyphenyl)-3-(1-methyl-1H-indol-3-yl)prop-2-en-1-one                            | C <sub>19</sub> H <sub>17</sub> NO <sub>2</sub>               |
| 55 | (E)-3-(1-methyl-1H-indol-3-yl)-1-(2,4,6-trimethoxyphenyl)prop-2-en-1-one                     | C <sub>21</sub> H <sub>21</sub> NO <sub>4</sub>               |
| 56 | (E)-1-(2,6-dimethoxyphenyl)-3-(1-methyl-1H-indol-3-yl)prop-2-en-1-one                        | C <sub>20</sub> H <sub>19</sub> NO <sub>3</sub>               |
| 57 | (E)-1,3-bis(1-methyl-1H-indol-3-yl)prop-2-en-1-one                                           | C <sub>21</sub> H <sub>18</sub> N <sub>2</sub> O              |
| 58 | (E)-3-(3-chloro-4,5-dimethoxyphenyl)-1-(naphthalen-2-yl)prop-2-en-1-one                      | C <sub>21</sub> H <sub>17</sub> ClO <sub>3</sub>              |
| 59 | (E)-3-(3-bromo-4,5-dimethoxyphenyl)-1-(naphthalen-2-yl)prop-2-en-1-one                       | C <sub>21</sub> H <sub>17</sub> BrO <sub>3</sub>              |
| 60 | (E)-3-(3-iodo-4,5-dimethoxyphenyl)-1-(naphthalen-2-yl)prop-2-en-1-one                        | C <sub>21</sub> H <sub>17</sub> IO <sub>3</sub>               |
| 61 | (E)-1-(naphthalen-2-yl)-3-(3,4,5-trimethoxyphenyl)prop-2-en-1-one                            | C <sub>22</sub> H <sub>20</sub> O <sub>4</sub>                |
| 62 | (E)-3-(3,4-dimethoxyphenyl)-1-(3-(quinazolin-4-ylamino)phenyl)prop-2-en-1-one                | C <sub>25</sub> H <sub>21</sub> N <sub>3</sub> O <sub>3</sub> |
| 63 | (E)-3-(4-methoxyphenyl)-1-(3-(quinazolin-4-ylamino)phenyl)prop-2-en-1-one                    | C <sub>24</sub> H <sub>19</sub> N <sub>3</sub> O <sub>2</sub> |
| 64 | (E)-3-(3,4-dimethoxyphenyl)-1-(3-((6,7-dimethoxyquinazolin-4-yl)amino)phenyl)prop-2-en-1-one | C <sub>27</sub> H <sub>25</sub> N <sub>3</sub> O <sub>5</sub> |
| 65 | (E)-1-(3-((6,7-dimethoxyquinazolin-4-yl)amino)phenyl)-3-(4-methoxyphenyl)prop-2-en-1-one     | C <sub>26</sub> H <sub>23</sub> N <sub>3</sub> O <sub>4</sub> |
| 66 | (E)-3-(3,4-dimethoxyphenyl)-1-(3-((2-                                                        | C <sub>31</sub> H <sub>25</sub> N <sub>3</sub> O <sub>3</sub> |

|    |                                                                                                        |                                                               |
|----|--------------------------------------------------------------------------------------------------------|---------------------------------------------------------------|
|    | phenylquinazolin-4-yl)amino)phenyl)prop-2-en-1-one                                                     |                                                               |
| 67 | (E)-3-(4-methoxyphenyl)-1-(3-((2-phenylquinazolin-4-yl)amino)phenyl)prop-2-en-1-one                    | C <sub>30</sub> H <sub>23</sub> N <sub>3</sub> O <sub>2</sub> |
| 68 | (E)-3-(3-methoxyphenyl)-1-(3-((2-phenylquinazolin-4-yl)amino)phenyl)prop-2-en-1-one                    | C <sub>30</sub> H <sub>23</sub> N <sub>3</sub> O <sub>2</sub> |
| 69 | (E)-3-(3,4-dimethoxyphenyl)-1-(3-((2-(3,4-dimethoxyphenyl)quinazolin-4-yl)amino)phenyl)prop-2-en-1-one | C <sub>33</sub> H <sub>29</sub> N <sub>3</sub> O <sub>5</sub> |
| 70 | (E)-1-(3-((2-(3,4-dimethoxyphenyl)quinazolin-4-yl)amino)phenyl)-3-(4-methoxyphenyl)prop-2-en-1-one     | C <sub>32</sub> H <sub>27</sub> N <sub>3</sub> O <sub>4</sub> |
| 71 | (E)-1-(3-((2-(3,4-dimethoxyphenyl)quinazolin-4-yl)amino)phenyl)-3-(3-methoxyphenyl)prop-2-en-1-one     | C <sub>32</sub> H <sub>27</sub> N <sub>3</sub> O <sub>4</sub> |
| 72 | (E)-3-(3,4-dimethoxyphenyl)-1-(4-(quinazolin-4-ylamino)phenyl)prop-2-en-1-one                          | C <sub>25</sub> H <sub>21</sub> N <sub>3</sub> O <sub>3</sub> |
| 73 | (E)-3-(3-methoxyphenyl)-1-(4-(quinazolin-4-ylamino)phenyl)prop-2-en-1-one                              | C <sub>24</sub> H <sub>19</sub> N <sub>3</sub> O <sub>2</sub> |
| 74 | (E)-3-(3,4-dimethoxyphenyl)-1-(4-((6,7-dimethoxyquinazolin-4-yl)amino)phenyl)prop-2-en-1-one           | C <sub>27</sub> H <sub>25</sub> N <sub>3</sub> O <sub>5</sub> |
| 75 | (E)-1-(4-((6,7-dimethoxyquinazolin-4-yl)amino)phenyl)-3-(3-methoxyphenyl)prop-2-en-1-one               | C <sub>26</sub> H <sub>23</sub> N <sub>3</sub> O <sub>4</sub> |
| 76 | (E)-3-(3,4-dimethoxyphenyl)-1-(4-((2-phenylquinazolin-4-yl)amino)phenyl)prop-2-en-1-one                | C <sub>31</sub> H <sub>25</sub> N <sub>3</sub> O <sub>3</sub> |
| 77 | (E)-3-(3-methoxyphenyl)-1-(4-((2-phenylquinazolin-4-yl)amino)phenyl)prop-2-en-1-one                    | C <sub>30</sub> H <sub>23</sub> N <sub>3</sub> O <sub>2</sub> |
| 78 | (E)-3-(4-methoxyphenyl)-1-(4-((2-phenylquinazolin-4-yl)amino)phenyl)prop-2-en-1-one                    | C <sub>30</sub> H <sub>23</sub> N <sub>3</sub> O <sub>2</sub> |
| 79 | (E)-3-phenyl-1-(4-((2-phenylquinazolin-4-yl)amino)phenyl)prop-2-en-1-one                               | C <sub>29</sub> H <sub>21</sub> N <sub>3</sub> O              |
| 80 | (E)-3-(3,4-dimethoxyphenyl)-1-(4-((2-(3,4-dimethoxyphenyl)quinazolin-4-yl)amino)phenyl)prop-2-en-1-one | C <sub>33</sub> H <sub>29</sub> N <sub>3</sub> O <sub>5</sub> |
| 81 | (E)-1-(4-((2-(3,4-dimethoxyphenyl)quinazolin-4-yl)amino)phenyl)-3-(3-methoxyphenyl)prop-2-en-1-one     | C <sub>32</sub> H <sub>27</sub> N <sub>3</sub> O <sub>4</sub> |
| 82 | (E)-1-(4-((2-(3,4-dimethoxyphenyl)quinazolin-4-yl)amino)phenyl)-3-(4-methoxyphenyl)prop-2-en-1-one     | C <sub>32</sub> H <sub>27</sub> N <sub>3</sub> O <sub>4</sub> |
| 83 | (E)-1-(4-((2-(3,4-dimethoxyphenyl)quinazolin-4-yl)amino)phenyl)-3-phenylprop-2-en-1-one                | C <sub>31</sub> H <sub>25</sub> N <sub>3</sub> O <sub>3</sub> |
| 84 | (E)-1-(4-methoxyphenyl)-3-(quinoxalin-6-yl)prop-2-en-1-one                                             | C <sub>18</sub> H <sub>14</sub> N <sub>2</sub> O <sub>2</sub> |
| 85 | (E)-1-(2,5-dimethoxyphenyl)-3-(quinoxalin-6-yl)prop-2-en-1-one                                         | C <sub>19</sub> H <sub>16</sub> N <sub>2</sub> O <sub>3</sub> |
| 86 | (E)-1-(3,4-dimethoxyphenyl)-3-(quinoxalin-6-yl)prop-2-en-1-one                                         | C <sub>19</sub> H <sub>16</sub> N <sub>2</sub> O <sub>3</sub> |
| 87 | (E)-1-(2,4-dimethoxyphenyl)-3-(quinoxalin-6-yl)prop-2-en-1-one                                         | C <sub>19</sub> H <sub>16</sub> N <sub>2</sub> O <sub>3</sub> |

|     |                                                                          |                                                                 |
|-----|--------------------------------------------------------------------------|-----------------------------------------------------------------|
| 88  | (E)-3-(quinoxalin-6-yl)-1-(3,4,5-trimethoxyphenyl)prop-2-en-1-one        | C <sub>20</sub> H <sub>18</sub> N <sub>2</sub> O <sub>4</sub>   |
| 89  | (E)-1-(4-hydroxy-3-methoxyphenyl)-3-(quinoxalin-6-yl)prop-2-en-1-one     | C <sub>18</sub> H <sub>14</sub> N <sub>2</sub> O <sub>3</sub>   |
| 90  | (E)-3-(quinoxalin-6-yl)-1-(2,4,5-trimethoxyphenyl)prop-2-en-1-one        | C <sub>20</sub> H <sub>18</sub> N <sub>2</sub> O <sub>4</sub>   |
| 91  | (E)-1-(3,5-dimethoxyphenyl)-3-(quinoxalin-6-yl)prop-2-en-1-one           | C <sub>19</sub> H <sub>16</sub> N <sub>2</sub> O <sub>3</sub>   |
| 92  | (E)-1-(2-methoxyphenyl)-3-(quinoxalin-6-yl)prop-2-en-1-one               | C <sub>18</sub> H <sub>14</sub> N <sub>2</sub> O <sub>2</sub>   |
| 93  | (E)-1-(4-hydroxy-3,5-dimethoxyphenyl)-3-(quinoxalin-6-yl)prop-2-en-1-one | C <sub>19</sub> H <sub>16</sub> N <sub>2</sub> O <sub>4</sub>   |
| 94  | (E)-1-(3-methoxyphenyl)-3-(quinoxalin-6-yl)prop-2-en-1-one               | C <sub>18</sub> H <sub>14</sub> N <sub>2</sub> O <sub>2</sub>   |
| 95  | (E)-3-(quinoxalin-6-yl)-1-(2,3,4-trimethoxyphenyl)prop-2-en-1-one        | C <sub>20</sub> H <sub>18</sub> N <sub>2</sub> O <sub>4</sub>   |
| 96  | (E)-N-(3-(3-(3,4-dimethoxyphenyl)acryloyl)phenyl)benzamide               | C <sub>24</sub> H <sub>21</sub> NO <sub>4</sub>                 |
| 97  | (E)-N-(3-(3-(3,4-dimethoxyphenyl)acryloyl)phenyl)-4-nitrobenzamide       | C <sub>24</sub> H <sub>20</sub> N <sub>2</sub> O <sub>6</sub>   |
| 98  | (E)-3-bromo-N-(3-(3-(3,4-dimethoxyphenyl)acryloyl)phenyl)benzamide       | C <sub>24</sub> H <sub>20</sub> BrNO <sub>4</sub>               |
| 99  | (E)-N-(4-(3-(3,4-dimethoxyphenyl)acryloyl)phenyl)benzamide               | C <sub>24</sub> H <sub>21</sub> NO <sub>4</sub>                 |
| 100 | (E)-N-(4-(3-(3,4-dimethoxyphenyl)acryloyl)phenyl)-2-nitrobenzamide       | C <sub>24</sub> H <sub>20</sub> N <sub>2</sub> O <sub>6</sub>   |
| 101 | (E)-N-(4-(3-(3,4-dimethoxyphenyl)acryloyl)phenyl)-3-nitrobenzamide       | C <sub>24</sub> H <sub>20</sub> N <sub>2</sub> O <sub>6</sub>   |
| 102 | (E)-N-(4-(3-(3,4-dimethoxyphenyl)acryloyl)phenyl)-4-nitrobenzamide       | C <sub>24</sub> H <sub>20</sub> N <sub>2</sub> O <sub>6</sub>   |
| 103 | (E)-3-bromo-N-(4-(3-(3,4-dimethoxyphenyl)acryloyl)phenyl)benzamide       | C <sub>24</sub> H <sub>20</sub> BrNO <sub>4</sub>               |
| 104 | (E)-4-bromo-N-(4-(3-(3,4-dimethoxyphenyl)acryloyl)phenyl)benzamide       | C <sub>24</sub> H <sub>20</sub> BrNO <sub>4</sub>               |
| 105 | (E)-3-chloro-N-(4-(3-(3,4-dimethoxyphenyl)acryloyl)phenyl)benzamide      | C <sub>24</sub> H <sub>20</sub> ClNO <sub>4</sub>               |
| 106 | (E)-4-chloro-N-(4-(3-(3,4-dimethoxyphenyl)acryloyl)phenyl)benzamide      | C <sub>24</sub> H <sub>20</sub> ClNO <sub>4</sub>               |
| 107 | (E)-3,4-dichloro-N-(4-(3-(3,4-dimethoxyphenyl)acryloyl)phenyl)benzamide  | C <sub>24</sub> H <sub>19</sub> Cl <sub>2</sub> NO <sub>4</sub> |
| 108 | (E)-N-(4-(3-(3,4-dimethoxyphenyl)acryloyl)phenyl)-2-fluorobenzamide      | C <sub>24</sub> H <sub>20</sub> FNO <sub>4</sub>                |
| 109 | (E)-4-cyano-N-(4-(3-(3,4-dimethoxyphenyl)acryloyl)phenyl)benzamide       | C <sub>25</sub> H <sub>20</sub> N <sub>2</sub> O <sub>4</sub>   |
| 110 | (E)-N-(4-(3-(3,4-dimethoxyphenyl)acryloyl)phenyl)-4-                     | C <sub>25</sub> H <sub>20</sub> F <sub>3</sub> NO <sub>4</sub>  |

|     |                                                                                                |                                                                 |
|-----|------------------------------------------------------------------------------------------------|-----------------------------------------------------------------|
|     | (trifluoromethyl)benzamide                                                                     |                                                                 |
| 111 | (E)-N-(4-(3-(3,4-dimethoxyphenyl)acryloyl)phenyl)-2-methoxybenzamide                           | C <sub>25</sub> H <sub>23</sub> NO <sub>5</sub>                 |
| 112 | (E)-N-(4-(3-(3,4-dimethoxyphenyl)acryloyl)phenyl)-3-methoxybenzamide                           | C <sub>25</sub> H <sub>23</sub> NO <sub>5</sub>                 |
| 113 | (E)-N-(4-(3-(3,4-dimethoxyphenyl)acryloyl)phenyl)-4-methoxybenzamide                           | C <sub>25</sub> H <sub>23</sub> NO <sub>5</sub>                 |
| 114 | (E)-N-(4-(3-(3,4-dimethoxyphenyl)acryloyl)phenyl)-3,4-dimethoxybenzamide                       | C <sub>26</sub> H <sub>25</sub> NO <sub>6</sub>                 |
| 115 | (E)-N-(4-(3-(3,4-dimethoxyphenyl)acryloyl)phenyl)-3,4,5-trimethoxybenzamide                    | C <sub>27</sub> H <sub>27</sub> NO <sub>7</sub>                 |
| 116 | (E)-N-(2-(3-(3,4-dimethoxyphenyl)acryloyl)phenyl)benzamide                                     | C <sub>24</sub> H <sub>21</sub> NO <sub>4</sub>                 |
| 117 | (E)-3-chloro-N-(2-(3-(3,4-dimethoxyphenyl)acryloyl)phenyl)benzamide                            | C <sub>24</sub> H <sub>20</sub> ClNO <sub>4</sub>               |
| 118 | (E)-4-chloro-N-(2-(3-(3,4-dimethoxyphenyl)acryloyl)phenyl)benzamide                            | C <sub>24</sub> H <sub>20</sub> ClNO <sub>4</sub>               |
| 119 | (E)-N-(2-(3-(3,4-dimethoxyphenyl)acryloyl)phenyl)-2-nitrobenzamide                             | C <sub>24</sub> H <sub>20</sub> N <sub>2</sub> O <sub>6</sub>   |
| 120 | (E)-N-(2-(3-(3,4-dimethoxyphenyl)acryloyl)phenyl)-3-nitrobenzamide                             | C <sub>24</sub> H <sub>20</sub> N <sub>2</sub> O <sub>6</sub>   |
| 121 | (E)-N-(2-(3-(3,4-dimethoxyphenyl)acryloyl)phenyl)-2-methoxybenzamide                           | C <sub>25</sub> H <sub>23</sub> NO <sub>5</sub>                 |
| 122 | (E)-N-(2-(3-(3,4-dimethoxyphenyl)acryloyl)phenyl)-3-methoxybenzamide                           | C <sub>25</sub> H <sub>23</sub> NO <sub>5</sub>                 |
| 123 | (E)-N-(2-(3-(3,4-dimethoxyphenyl)acryloyl)phenyl)-3-(quinolin-3-yl)benzamide                   | C <sub>33</sub> H <sub>26</sub> N <sub>2</sub> O <sub>4</sub>   |
| 124 | (E)-N-(2-(3-(3,4-dimethoxyphenyl)acryloyl)phenyl)-3-(naphthalen-1-yl)benzamide                 | C <sub>34</sub> H <sub>27</sub> NO <sub>4</sub>                 |
| 125 | (E)-N-(2-(3-(3,4-dimethoxyphenyl)acryloyl)phenyl)-3-(pyridin-3-yl)benzamide                    | C <sub>29</sub> H <sub>24</sub> N <sub>2</sub> O <sub>4</sub>   |
| 126 | (E)-N-(2-(3-(3,4-dimethoxyphenyl)acryloyl)phenyl)-3-(7-methoxy-2-oxo-2H-chromen-5-yl)benzamide | C <sub>34</sub> H <sub>27</sub> NO <sub>7</sub>                 |
| 127 | (E)-N-(2-(3-(3,4-dimethoxyphenyl)acryloyl)phenyl)-2-(thiophen-2-yl)benzamide                   | C <sub>28</sub> H <sub>23</sub> NO <sub>4</sub> S               |
| 128 | (E)-3-chloro-N-(2-(3-(3-chlorophenyl)acryloyl)phenyl)benzamide                                 | C <sub>22</sub> H <sub>15</sub> Cl <sub>2</sub> NO <sub>2</sub> |
| 129 | (E)-N-(2-(3-(3-chlorophenyl)acryloyl)phenyl)-3,4-dimethoxybenzamide                            | C <sub>24</sub> H <sub>20</sub> ClNO <sub>4</sub>               |
| 130 | (E)-N-(2-(3-(4-fluoro-3-methoxyphenyl)acryloyl)phenyl)-2-(thiophen-2-yl)benzamide              | C <sub>27</sub> H <sub>20</sub> FNO <sub>3</sub> S              |
| 131 | (E)-3-chloro-N-(2-(3-(4-fluoro-3-methoxyphenyl)acryloyl)phenyl)benzamide                       | C <sub>23</sub> H <sub>17</sub> ClFNO <sub>3</sub>              |
| 132 | (E)-N-(3-(3-(4-(2-(6,7-dimethoxy-3,4-                                                          | C <sub>38</sub> H <sub>35</sub> N <sub>3</sub> O <sub>5</sub>   |

|     |                                                                                                                                                                    |                                                               |
|-----|--------------------------------------------------------------------------------------------------------------------------------------------------------------------|---------------------------------------------------------------|
|     | dihydroisoquinolin-2(1H)-yl)ethoxy)phenyl)acryloyl)phenyl)quinoline-2-carboxamide                                                                                  |                                                               |
| 133 | (E)-N-(3-(3-(4-(2-(6-methoxy-7-(2-methoxyethyl)-3,4-dihydroisoquinolin-2(1H)-yl)ethoxy)phenyl)acryloyl)phenyl)quinoline-2-carboxamide                              | C <sub>40</sub> H <sub>39</sub> N <sub>3</sub> O <sub>5</sub> |
| 134 | (E)-N-(3-(3-(4-(2-(6-methoxy-7-(2-(2-(2-methoxyethoxy)ethoxy)ethyl)-3,4-dihydroisoquinolin-2(1H)-yl)ethoxy)phenyl)acryloyl)phenyl)quinoline-2-carboxamide          | C <sub>44</sub> H <sub>47</sub> N <sub>3</sub> O <sub>7</sub> |
| 135 | (E)-N-(5-(3-(4-(2-(6,7-dimethoxy-3,4-dihydroisoquinolin-2(1H)-yl)ethoxy)phenyl)acryloyl)-2-methylphenyl)quinoline-2-carboxamide                                    | C <sub>39</sub> H <sub>37</sub> N <sub>3</sub> O <sub>5</sub> |
| 136 | (E)-N-(5-(3-(4-(2-(6-methoxy-7-(2-methoxyethyl)-3,4-dihydroisoquinolin-2(1H)-yl)ethoxy)phenyl)acryloyl)-2-methylphenyl)quinoline-2-carboxamide                     | C <sub>41</sub> H <sub>41</sub> N <sub>3</sub> O <sub>5</sub> |
| 137 | (E)-N-(5-(3-(4-(2-(6-methoxy-7-(2-(2-(2-methoxyethoxy)ethoxy)ethyl)-3,4-dihydroisoquinolin-2(1H)-yl)ethoxy)phenyl)acryloyl)-2-methylphenyl)quinoline-2-carboxamide | C <sub>45</sub> H <sub>49</sub> N <sub>3</sub> O <sub>7</sub> |
| 138 | (E)-1-(2-(allyloxy)-4-methoxyphenyl)-3-(4-methoxyphenyl)prop-2-en-1-one                                                                                            | C <sub>20</sub> H <sub>20</sub> O <sub>4</sub>                |
| 139 | (E)-3-(1H-indol-5-yl)-1-(5-methoxy-2,2-dimethyl-2H-chromen-8-yl)prop-2-en-1-one                                                                                    | C <sub>23</sub> H <sub>21</sub> NO <sub>3</sub>               |
| 140 | (E)-2-(2-methoxy-5-(3-(5-methoxy-2,2-dimethyl-2H-chromen-8-yl)-3-oxoprop-1-en-1-yl)phenoxy)-N-(2-methoxyphenyl)acetamide                                           | C <sub>31</sub> H <sub>31</sub> NO <sub>7</sub>               |
| 141 | (E)-N-(2-chlorophenyl)-2-(2-methoxy-5-(3-oxo-3-(3,4,5-trimethoxyphenyl)prop-1-en-1-yl)phenoxy)acetamide                                                            | C <sub>27</sub> H <sub>26</sub> ClNO <sub>7</sub>             |
| 142 | (E)-3-(3-hydroxy-4-methoxyphenyl)-1-(2-methoxynaphthalen-1-yl)prop-2-en-1-one                                                                                      | C <sub>21</sub> H <sub>18</sub> O <sub>4</sub>                |
| 143 | (E)-3-(4-bromophenyl)-1-(2-methoxynaphthalen-1-yl)prop-2-en-1-one                                                                                                  | C <sub>20</sub> H <sub>15</sub> BrO <sub>2</sub>              |
| 144 | (E)-1-(2-methoxynaphthalen-1-yl)-3-(2,3,4-trimethoxyphenyl)prop-2-en-1-one                                                                                         | C <sub>23</sub> H <sub>22</sub> O <sub>5</sub>                |
| 145 | (E)-3-(2-bromophenyl)-1-(2-methoxynaphthalen-1-yl)prop-2-en-1-one                                                                                                  | C <sub>20</sub> H <sub>15</sub> BrO <sub>2</sub>              |
| 146 | (E)-1-(2-methoxynaphthalen-1-yl)-3-(naphthalen-1-yl)prop-2-en-1-one                                                                                                | C <sub>24</sub> H <sub>18</sub> O <sub>2</sub>                |
| 147 | (E)-1-(2-methoxynaphthalen-1-yl)-3-(naphthalen-2-yl)prop-2-en-1-one                                                                                                | C <sub>24</sub> H <sub>18</sub> O <sub>2</sub>                |
| 148 | (E)-3-(3-bromo-4-methoxyphenyl)-1-(2-methoxynaphthalen-1-yl)prop-2-en-1-one                                                                                        | C <sub>21</sub> H <sub>17</sub> BrO <sub>3</sub>              |
| 149 | (E)-1-(2-methoxynaphthalen-1-yl)-3-(3-                                                                                                                             | C <sub>21</sub> H <sub>18</sub> O <sub>3</sub>                |

|     |                                                                                      |                                                  |
|-----|--------------------------------------------------------------------------------------|--------------------------------------------------|
|     | methoxyphenyl)prop-2-en-1-one                                                        |                                                  |
| 150 | (E)-3-(4-methoxy-3-nitrophenyl)-1-(2-methoxynaphthalen-1-yl)prop-2-en-1-one          | C <sub>21</sub> H <sub>17</sub> NO <sub>5</sub>  |
| 151 | (E)-1-(2-methoxynaphthalen-1-yl)-3-(3-(thiophen-2-yl)phenyl)prop-2-en-1-one          | C <sub>24</sub> H <sub>18</sub> O <sub>2</sub> S |
| 152 | (E)-3-(4-chlorophenyl)-1-(2-methoxynaphthalen-1-yl)prop-2-en-1-one                   | C <sub>20</sub> H <sub>15</sub> ClO <sub>2</sub> |
| 153 | (E)-1-(2-methoxynaphthalen-1-yl)-3-(2,4,5-trimethoxyphenyl)prop-2-en-1-one           | C <sub>23</sub> H <sub>22</sub> O <sub>5</sub>   |
| 154 | (E)-3-(2-fluorophenyl)-1-(2-methoxynaphthalen-1-yl)prop-2-en-1-one                   | C <sub>20</sub> H <sub>15</sub> FO <sub>2</sub>  |
| 155 | (E)-1-(2-methoxynaphthalen-1-yl)-3-phenylprop-2-en-1-one                             | C <sub>20</sub> H <sub>16</sub> O <sub>2</sub>   |
| 156 | (E)-3-(3-fluorophenyl)-1-(2-methoxynaphthalen-1-yl)prop-2-en-1-one                   | C <sub>20</sub> H <sub>15</sub> FO <sub>2</sub>  |
| 157 | (E)-1-(2-methoxynaphthalen-1-yl)-3-(3,4,5-trimethoxyphenyl)prop-2-en-1-one           | C <sub>23</sub> H <sub>22</sub> O <sub>5</sub>   |
| 158 | (E)-1-(2-methoxynaphthalen-1-yl)-3-(2-methoxyphenyl)prop-2-en-1-one                  | C <sub>21</sub> H <sub>18</sub> O <sub>3</sub>   |
| 159 | (E)-3-(4-(dimethylamino)phenyl)-1-(2-methoxynaphthalen-1-yl)prop-2-en-1-one          | C <sub>22</sub> H <sub>21</sub> NO <sub>2</sub>  |
| 160 | (E)-3-(4-(diethylamino)phenyl)-1-(2-methoxynaphthalen-1-yl)prop-2-en-1-one           | C <sub>24</sub> H <sub>25</sub> NO <sub>2</sub>  |
| 161 | (E)-3-(3-amino-4-methoxyphenyl)-1-(2-methoxynaphthalen-1-yl)prop-2-en-1-one          | C <sub>21</sub> H <sub>19</sub> NO <sub>3</sub>  |
| 162 | (E)-3-(4-chlorophenyl)-1-(3-(3,4,5-trimethoxyphenoxy)phenyl)prop-2-en-1-one          | C <sub>24</sub> H <sub>21</sub> ClO <sub>5</sub> |
| 163 | (E)-3-(4-methoxyphenyl)-1-(3-(3,4,5-trimethoxyphenoxy)phenyl)prop-2-en-1-one         | C <sub>25</sub> H <sub>24</sub> O <sub>6</sub>   |
| 164 | (E)-3-(4-(diethylamino)phenyl)-1-(3-(3,4,5-trimethoxyphenoxy)phenyl)prop-2-en-1-one  | C <sub>28</sub> H <sub>31</sub> NO <sub>5</sub>  |
| 165 | (E)-3-(4-(dimethylamino)phenyl)-1-(3-(3,4,5-trimethoxyphenoxy)phenyl)prop-2-en-1-one | C <sub>26</sub> H <sub>27</sub> NO <sub>5</sub>  |
| 166 | (E)-1-(3-(3,4,5-trimethoxyphenoxy)phenyl)-3-(3,4,5-trimethoxyphenyl)prop-2-en-1-one  | C <sub>27</sub> H <sub>28</sub> O <sub>8</sub>   |
| 167 | (E)-3-phenyl-1-(3-(3,4,5-trimethoxyphenoxy)phenyl)prop-2-en-1-one                    | C <sub>24</sub> H <sub>22</sub> O <sub>5</sub>   |
| 168 | (E)-3-(2-fluorophenyl)-1-(3-(3,4,5-trimethoxyphenoxy)phenyl)prop-2-en-1-one          | C <sub>24</sub> H <sub>21</sub> FO <sub>5</sub>  |
| 169 | (E)-3-(naphthalen-1-yl)-1-(3-(3,4,5-trimethoxyphenoxy)phenyl)prop-2-en-1-one         | C <sub>28</sub> H <sub>24</sub> O <sub>5</sub>   |
| 170 | (E)-3-(4-bromophenyl)-1-(3-(3,4,5-trimethoxyphenoxy)phenyl)prop-2-en-1-one           | C <sub>24</sub> H <sub>21</sub> BrO <sub>5</sub> |
| 171 | (E)-3-(4-fluorophenyl)-1-(3-(3,4,5-trimethoxyphenoxy)phenyl)prop-2-en-1-one          | C <sub>24</sub> H <sub>21</sub> FO <sub>5</sub>  |



|     |                                                                                                                                                                        |                                                                |
|-----|------------------------------------------------------------------------------------------------------------------------------------------------------------------------|----------------------------------------------------------------|
| 172 | (E)-3-(3-fluorophenyl)-1-(3-(3,4,5-trimethoxyphenoxy)phenyl)prop-2-en-1-one                                                                                            | C <sub>24</sub> H <sub>21</sub> FO <sub>5</sub>                |
| 173 | (E)-1-(3-(3,4,5-trimethoxyphenoxy)phenyl)-3-(2,3,4-trimethoxyphenyl)prop-2-en-1-one                                                                                    | C <sub>27</sub> H <sub>28</sub> O <sub>8</sub>                 |
| 174 | (E)-3-(4-methoxy-3-nitrophenyl)-1-(3-(3,4,5-trimethoxyphenoxy)phenyl)prop-2-en-1-one                                                                                   | C <sub>25</sub> H <sub>23</sub> NO <sub>8</sub>                |
| 175 | (E)-3-(naphthalen-2-yl)-1-(3-(3,4,5-trimethoxyphenoxy)phenyl)prop-2-en-1-one                                                                                           | C <sub>28</sub> H <sub>24</sub> O <sub>5</sub>                 |
| 176 | (E)-3-(3-chlorophenyl)-1-(3-(3,4,5-trimethoxyphenoxy)phenyl)prop-2-en-1-one                                                                                            | C <sub>24</sub> H <sub>21</sub> ClO <sub>5</sub>               |
| 177 | (E)-3-(3-amino-4-methoxyphenyl)-1-(3-(3,4,5-trimethoxyphenoxy)phenyl)prop-2-en-1-one                                                                                   | C <sub>25</sub> H <sub>25</sub> NO <sub>6</sub>                |
| 178 | (E)-3-(5-methoxy-2-methyl-1H-indol-3-yl)-1-(pyridin-4-yl)prop-2-en-1-one                                                                                               | C <sub>18</sub> H <sub>16</sub> N <sub>2</sub> O <sub>2</sub>  |
| 179 | (E)-3-(3-hydroxy-4-methoxyphenyl)-1-(7-methoxybenzo[d][1,3]dioxol-5-yl)prop-2-en-1-one                                                                                 | C <sub>18</sub> H <sub>16</sub> O <sub>6</sub>                 |
| 180 | (E)-3-(3-fluoro-4-methoxyphenyl)-1-(7-methoxybenzo[d][1,3]dioxol-5-yl)prop-2-en-1-one                                                                                  | C <sub>18</sub> H <sub>15</sub> FO <sub>5</sub>                |
| 181 | (E)-1-(7-methoxybenzo[d][1,3]dioxol-5-yl)-3-(6-methoxypyridin-3-yl)prop-2-en-1-one                                                                                     | C <sub>17</sub> H <sub>15</sub> NO <sub>5</sub>                |
| 182 | (E)-3-(4-methoxy-3-nitrophenyl)-1-(7-methoxybenzo[d][1,3]dioxol-5-yl)prop-2-en-1-one                                                                                   | C <sub>18</sub> H <sub>15</sub> NO <sub>7</sub>                |
| 183 | (E)-3-(3-amino-4-methoxyphenyl)-1-(7-methoxybenzo[d][1,3]dioxol-5-yl)prop-2-en-1-one                                                                                   | C <sub>18</sub> H <sub>17</sub> NO <sub>5</sub>                |
| 184 | (E)-3-(3-hydroxy-4-methoxyphenyl)-1-(7-methoxybenzo[d][1,3]dioxol-5-yl)-2-methylprop-2-en-1-one                                                                        | C <sub>19</sub> H <sub>18</sub> O <sub>6</sub>                 |
| 185 | (E)-3-(3-amino-4-methoxyphenyl)-1-(7-methoxybenzo[d][1,3]dioxol-5-yl)-2-methylprop-2-en-1-one                                                                          | C <sub>19</sub> H <sub>19</sub> NO <sub>5</sub>                |
| 186 | (E)-O-((2-methoxy-5-(3-(7-methoxybenzo[d][1,3]dioxol-5-yl)-2-methyl-3-oxoprop-1-en-1-yl)phenyl)amino)serine                                                            | C <sub>22</sub> H <sub>24</sub> N <sub>2</sub> O <sub>8</sub>  |
| 187 | (E)-2-amino-5-(((5-(((2-methoxy-5-(3-(7-methoxybenzo[d][1,3]dioxol-5-yl)-2-methyl-3-oxoprop-1-en-1-yl)phenyl)amino)oxy)pyrrolidine-2-carbonyl)oxy)amino)pentanoic acid | C <sub>29</sub> H <sub>36</sub> N <sub>4</sub> O <sub>10</sub> |
| 188 | (E)-3-(3-(2-methoxyphenyl)-3-oxoprop-1-en-1-yl)quinolin-2(1H)-one                                                                                                      | C <sub>19</sub> H <sub>15</sub> NO <sub>3</sub>                |
| 189 | (E)-6-methoxy-3-(3-(2-methoxyphenyl)-3-oxoprop-1-en-1-yl)quinolin-2(1H)-one                                                                                            | C <sub>20</sub> H <sub>17</sub> NO <sub>4</sub>                |
| 190 | (E)-1-(4-methoxyphenyl)-3-(4-(4-(piperidin-1-yl)butoxy)phenyl)prop-2-en-1-one                                                                                          | C <sub>25</sub> H <sub>31</sub> NO <sub>3</sub>                |
| 191 | (E)-1-(2-hydroxyphenyl)-3-(4-(4-(piperidin-1-yl)butoxy)phenyl)prop-2-en-1-one                                                                                          | C <sub>24</sub> H <sub>29</sub> NO <sub>3</sub>                |

|     |                                                                                                |                                                                 |
|-----|------------------------------------------------------------------------------------------------|-----------------------------------------------------------------|
| 192 | (E)-1-(4-bromophenyl)-3-(4-(4-(piperidin-1-yl)butoxy)phenyl)prop-2-en-1-one                    | C <sub>24</sub> H <sub>28</sub> BrNO <sub>2</sub>               |
| 193 | (E)-1-phenyl-3-(4-(4-(piperidin-1-yl)butoxy)phenyl)prop-2-en-1-one                             | C <sub>24</sub> H <sub>29</sub> NO <sub>2</sub>                 |
| 194 | (E)-1-(4-bromophenyl)-3-(4-(4-(piperidin-1-yl)butoxy)phenyl)prop-2-en-1-one                    | C <sub>24</sub> H <sub>28</sub> BrNO <sub>2</sub>               |
| 195 | (E)-1-(4-chlorophenyl)-3-(4-(4-(piperidin-1-yl)butoxy)phenyl)prop-2-en-1-one                   | C <sub>24</sub> H <sub>28</sub> ClNO <sub>2</sub>               |
| 196 | (E)-1-(2,4-dichlorophenyl)-3-(4-(4-(piperidin-1-yl)butoxy)phenyl)prop-2-en-1-one               | C <sub>24</sub> H <sub>27</sub> Cl <sub>2</sub> NO <sub>2</sub> |
| 197 | (E)-1-(4-methoxyphenyl)-3-(4-(2-morpholinoethoxy)phenyl)prop-2-en-1-one                        | C <sub>22</sub> H <sub>25</sub> NO <sub>4</sub>                 |
| 198 | (E)-1-(4-bromophenyl)-3-(4-(2-morpholinoethoxy)phenyl)prop-2-en-1-one                          | C <sub>21</sub> H <sub>22</sub> BrNO <sub>3</sub>               |
| 199 | (E)-1-(2,4-dichlorophenyl)-3-(4-(2-morpholinoethoxy)phenyl)prop-2-en-1-one                     | C <sub>21</sub> H <sub>21</sub> Cl <sub>2</sub> NO <sub>3</sub> |
| 200 | (E)-3-(4-(2-morpholinoethoxy)phenyl)-1-(4-(trifluoromethyl)phenyl)prop-2-en-1-one              | C <sub>22</sub> H <sub>22</sub> F <sub>3</sub> NO <sub>3</sub>  |
| 201 | (E)-1-(4-methoxyphenyl)-3-(4-(3-morpholinopropoxy)phenyl)prop-2-en-1-one                       | C <sub>23</sub> H <sub>27</sub> NO <sub>4</sub>                 |
| 202 | (E)-3-(4-(3-(2,6-dimethylmorpholino)propoxy)phenyl)-1-(4-methoxyphenyl)prop-2-en-1-one         | C <sub>25</sub> H <sub>31</sub> NO <sub>4</sub>                 |
| 203 | (E)-3-(4-(3-(2,6-dimethylmorpholino)propoxy)phenyl)-1-(2-methoxyphenyl)prop-2-en-1-one         | C <sub>25</sub> H <sub>31</sub> NO <sub>4</sub>                 |
| 204 | (E)-1-(2,4-dichlorophenyl)-3-(4-(3-(2,6-dimethylmorpholino)propoxy)phenyl)prop-2-en-1-one      | C <sub>24</sub> H <sub>27</sub> Cl <sub>2</sub> NO <sub>3</sub> |
| 205 | (E)-3-(4-(3-(2,6-dimethylmorpholino)propoxy)phenyl)-1-(p-tolyl)prop-2-en-1-one                 | C <sub>25</sub> H <sub>31</sub> NO <sub>3</sub>                 |
| 206 | (E)-3-(4-(4-(indolin-2-yl)butoxy)phenyl)-1-(4-methoxyphenyl)prop-2-en-1-one                    | C <sub>28</sub> H <sub>29</sub> NO <sub>3</sub>                 |
| 207 | (E)-3-(4-(4-(indolin-1-yl)butoxy)phenyl)-1-(4-methoxyphenyl)prop-2-en-1-one                    | C <sub>28</sub> H <sub>29</sub> NO <sub>3</sub>                 |
| 208 | (E)-3-(4-(4-(3,4-dihydroquinolin-1(2H)-yl)butoxy)phenyl)-1-phenylprop-2-en-1-one               | C <sub>28</sub> H <sub>29</sub> NO <sub>2</sub>                 |
| 209 | (E)-3-(4-(4-(3,4-dihydroquinolin-1(2H)-yl)butoxy)phenyl)-1-(4-methoxyphenyl)prop-2-en-1-one    | C <sub>29</sub> H <sub>31</sub> NO <sub>3</sub>                 |
| 210 | (E)-1-(4-bromophenyl)-3-(4-(4-(3,4-dihydroquinolin-1(2H)-yl)butoxy)phenyl)prop-2-en-1-one      | C <sub>28</sub> H <sub>28</sub> BrNO <sub>2</sub>               |
| 211 | (E)-1-(4-chlorophenyl)-3-(4-(4-(3,4-dihydroquinolin-1(2H)-yl)butoxy)phenyl)prop-2-en-1-one     | C <sub>28</sub> H <sub>28</sub> ClNO <sub>2</sub>               |
| 212 | (E)-1-(2,4-dichlorophenyl)-3-(4-(4-(3,4-dihydroquinolin-1(2H)-yl)butoxy)phenyl)prop-2-en-1-one | C <sub>28</sub> H <sub>27</sub> Cl <sub>2</sub> NO <sub>2</sub> |
| 213 | (E)-1-(4-aminophenyl)-3-(4-(4-(3,4-dihydroquinolin-1(2H)-yl)butoxy)phenyl)prop-2-en-1-one      | C <sub>28</sub> H <sub>30</sub> N <sub>2</sub> O <sub>2</sub>   |

|     |                                                                                                                                                                            |                                                                |
|-----|----------------------------------------------------------------------------------------------------------------------------------------------------------------------------|----------------------------------------------------------------|
| 214 | (E)-1-(4-aminophenyl)-3-(4-(4-(3,5-dimethyl-1H-pyrazol-1-yl)butoxy)phenyl)prop-2-en-1-one                                                                                  | C <sub>24</sub> H <sub>27</sub> N <sub>3</sub> O <sub>2</sub>  |
| 215 | (1R)-1-(5,8-dihydroxy-1,4-dioxo-1,2,3,4-tetrahydronaphthalen-2-yl)-4-methylpent-3-en-1-yl 2-(4-((E)-3-oxo-3-phenylprop-1-en-1-yl)phenoxy)acetate                           | C <sub>33</sub> H <sub>30</sub> O <sub>8</sub>                 |
| 216 | (1R)-1-(5,8-dihydroxy-1,4-dioxo-1,2,3,4-tetrahydronaphthalen-2-yl)-4-methylpent-3-en-1-yl 2-(4-((E)-3-(4-methoxyphenyl)-3-oxoprop-1-en-1-yl)phenoxy)acetate                | C <sub>34</sub> H <sub>32</sub> O <sub>9</sub>                 |
| 217 | (1R)-1-(5,8-dihydroxy-1,4-dioxo-1,2,3,4-tetrahydronaphthalen-2-yl)-4-methylpent-3-en-1-yl 2-(4-((E)-3-oxo-3-(3,4,5-trimethoxyphenyl)prop-1-en-1-yl)phenoxy)acetate         | C <sub>36</sub> H <sub>36</sub> O <sub>11</sub>                |
| 218 | (1R)-1-(5,8-dihydroxy-1,4-dioxo-1,2,3,4-tetrahydronaphthalen-2-yl)-4-methylpent-3-en-1-yl 2-(4-((E)-3-oxo-3-(4-(trifluoromethyl)phenyl)prop-1-en-1-yl)phenoxy)acetate      | C <sub>34</sub> H <sub>29</sub> F <sub>3</sub> O <sub>8</sub>  |
| 219 | (1R)-1-(5,8-dihydroxy-1,4-dioxo-1,2,3,4-tetrahydronaphthalen-2-yl)-4-methylpent-3-en-1-yl 2-(4-((E)-3-oxo-3-(2,3,4-trichlorophenyl)prop-1-en-1-yl)phenoxy)acetate          | C <sub>33</sub> H <sub>27</sub> Cl <sub>3</sub> O <sub>8</sub> |
| 220 | (1R)-1-(5,8-dihydroxy-1,4-dioxo-1,2,3,4-tetrahydronaphthalen-2-yl)-4-methylpent-3-en-1-yl 2-(4-((E)-3-oxo-3-(2-(trifluoromethyl)phenyl)prop-1-en-1-yl)phenoxy)acetate      | C <sub>34</sub> H <sub>29</sub> F <sub>3</sub> O <sub>8</sub>  |
| 221 | (1R)-1-(5,8-dihydroxy-1,4-dioxo-1,2,3,4-tetrahydronaphthalen-2-yl)-4-methylpent-3-en-1-yl 2-(4-((E)-3-(2-methoxyphenyl)-3-oxoprop-1-en-1-yl)phenoxy)acetate                | C <sub>34</sub> H <sub>32</sub> O <sub>9</sub>                 |
| 222 | (1R)-1-(5,8-dihydroxy-1,4-dioxo-1,2,3,4-tetrahydronaphthalen-2-yl)-4-methylpent-3-en-1-yl 2-(4-((E)-3-oxo-3-(3-(trifluoromethyl)phenyl)prop-1-en-1-yl)phenoxy)acetate      | C <sub>34</sub> H <sub>29</sub> F <sub>3</sub> O <sub>8</sub>  |
| 223 | (1R)-1-(5,8-dihydroxy-1,4-dioxo-1,2,3,4-tetrahydronaphthalen-2-yl)-4-methylpent-3-en-1-yl 2-(4-((E)-3-(4-ethylphenyl)-3-oxoprop-1-en-1-yl)phenoxy)acetate                  | C <sub>35</sub> H <sub>34</sub> O <sub>8</sub>                 |
| 224 | (1R)-1-(5,8-dihydroxy-1,4-dioxo-1,2,3,4-tetrahydronaphthalen-2-yl)-4-methylpent-3-en-1-yl 2-(4-((E)-3-(2-fluorophenyl)-3-oxoprop-1-en-1-yl)phenoxy)acetate                 | C <sub>33</sub> H <sub>29</sub> FO <sub>8</sub>                |
| 225 | (1R)-1-(5,8-dihydroxy-1,4-dioxo-1,2,3,4-tetrahydronaphthalen-2-yl)-4-methylpent-3-en-1-yl 2-(4-((E)-3-(3,5-bis(trifluoromethyl)phenyl)-3-oxoprop-1-en-1-yl)phenoxy)acetate | C <sub>35</sub> H <sub>28</sub> F <sub>6</sub> O <sub>8</sub>  |

|     |                                                                                                                                                                        |                                                                               |
|-----|------------------------------------------------------------------------------------------------------------------------------------------------------------------------|-------------------------------------------------------------------------------|
| 226 | (1R)-1-(5,8-dihydroxy-1,4-dioxo-1,2,3,4-tetrahydronaphthalen-2-yl)-4-methylpent-3-en-1-yl 2-(4-((E)-3-oxo-3-(3-(trifluoromethoxy)phenyl)prop-1-en-1-yl)phenoxy)acetate | C <sub>34</sub> H <sub>29</sub> F <sub>3</sub> O <sub>9</sub>                 |
| 227 | (1R)-1-(5,8-dihydroxy-1,4-dioxo-1,2,3,4-tetrahydronaphthalen-2-yl)-4-methylpent-3-en-1-yl 2-(4-((E)-3-(3-methoxyphenyl)-3-oxoprop-1-en-1-yl)phenoxy)acetate            | C <sub>34</sub> H <sub>32</sub> O <sub>9</sub>                                |
| 228 | (1R)-1-(5,8-dihydroxy-1,4-dioxo-1,2,3,4-tetrahydronaphthalen-2-yl)-4-methylpent-3-en-1-yl 2-(4-((E)-3-oxo-3-(o-tolyl)prop-1-en-1-yl)phenoxy)acetate                    | C <sub>34</sub> H <sub>32</sub> O <sub>8</sub>                                |
| 229 | (1R)-1-(5,8-dihydroxy-1,4-dioxo-1,2,3,4-tetrahydronaphthalen-2-yl)-4-methylpent-3-en-1-yl 2-(4-((E)-3-(2-chlorophenyl)-3-oxoprop-1-en-1-yl)phenoxy)acetate             | C <sub>33</sub> H <sub>29</sub> ClO <sub>8</sub>                              |
| 230 | (1R)-1-(5,8-dihydroxy-1,4-dioxo-1,2,3,4-tetrahydronaphthalen-2-yl)-4-methylpent-3-en-1-yl 2-(4-((E)-3-(2-bromophenyl)-3-oxoprop-1-en-1-yl)phenoxy)acetate              | C <sub>33</sub> H <sub>29</sub> BrO <sub>8</sub>                              |
| 231 | (1R)-1-(5,8-dihydroxy-1,4-dioxo-1,2,3,4-tetrahydronaphthalen-2-yl)-4-methylpent-3-en-1-yl 2-(4-((E)-3-oxo-3-(m-tolyl)prop-1-en-1-yl)phenoxy)acetate                    | C <sub>34</sub> H <sub>32</sub> O <sub>8</sub>                                |
| 232 | (1R)-1-(5,8-dihydroxy-1,4-dioxo-1,2,3,4-tetrahydronaphthalen-2-yl)-4-methylpent-3-en-1-yl 2-(4-((E)-3-oxo-3-(p-tolyl)prop-1-en-1-yl)phenoxy)acetate                    | C <sub>34</sub> H <sub>32</sub> O <sub>8</sub>                                |
| 233 | (E)-3-(2,4-dichlorophenyl)-1-(4-((1-vinyl-1H-1,2,3-triazol-4-yl)methoxy)phenyl)prop-2-en-1-one                                                                         | C <sub>20</sub> H <sub>15</sub> Cl <sub>2</sub> N <sub>3</sub> O <sub>2</sub> |
