# Supplementary material for: Two Important Anticancer Mechanisms of Natural and Synthetic Chalcones
Source: MDPI journal article supplement (doi:10.3390/ijms231911595), 2022-09-30
Supplement: s1 [file s1]

## Supplementary Figure

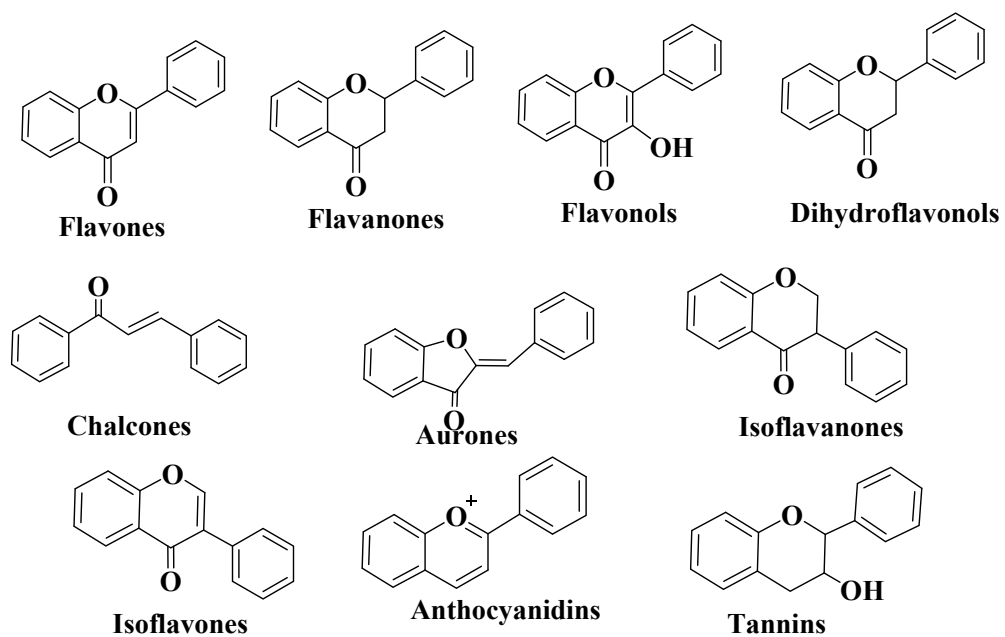

Figure S1. Basic structure of flavonoids.

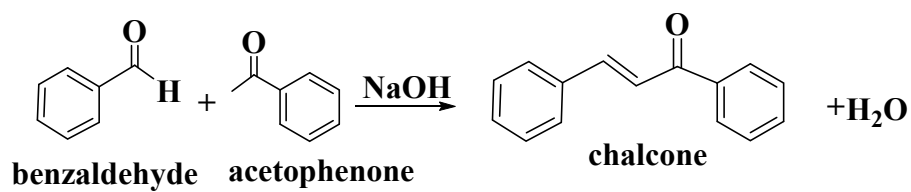

Figure S2. Claisen-Schmidt reaction.
