# Supplementary material for: Two Important Anticancer Mechanisms of Natural and Synthetic Chalcones
Source: MDPI journal article supplement (doi:10.3390/ijms231911595), 2022-09-30
Supplement: s1 [file s1]

| <b>Table S3.</b> Half-maximal inhibitory concentration (IC50) of the most effective chalcones compounds |                               |                 |                 |                 |                 |                 |                |         |         |        |       |
|---------------------------------------------------------------------------------------------------------|-------------------------------|-----------------|-----------------|-----------------|-----------------|-----------------|----------------|---------|---------|--------|-------|
| Com-<br>pound                                                                                           | IC50 (μM) for the cell lines: |                 |                 |                 |                 |                 |                |         |         |        |       |
|                                                                                                         | A549                          | HeLa            | Bel-7402        | MCF-7           | HCT-8           | H460-<br>MX20   | BCRP/<br>ABCG2 | MV-4-11 | SK-OV-3 | KB-C-2 | HepG2 |
| 8                                                                                                       | 0.003±<br>0.001               | 0.007±<br>0.004 | 0.009±<br>0.002 | 0.006±<br>0.003 | 0.006±<br>0.002 | -               | -              | -       | -       | -      | -     |
| 9                                                                                                       | -                             | -               | -               | -               | -               | 0.442±<br>0.144 | -              | -       | -       | -      | -     |
| 40                                                                                                      | -                             | -               | -               | -               | -               | -               | 0.35±0.14      | -       | -       | -      | -     |
| 41                                                                                                      | -                             | -               | -               | -               | -               | -               | 0.17±0.07      | -       | -       | -      | -     |
| 44                                                                                                      | -                             | -               | -               | -               | -               | -               | 0.26±0.04      | -       | -       | -      | -     |
| 50                                                                                                      | -                             | -               | -               | -               | -               | -               | 0.45±0.09      | -       | -       | -      | -     |
| 51                                                                                                      | -                             | -               | -               | -               | -               | -               | 0.27±0.08      | -       | -       | -      | -     |
| 52                                                                                                      | -                             | -               | -               | -               | -               | -               | 0.35±0.09      | -       | -       | -      | -     |
| 58                                                                                                      | -                             | -               | -               | 1.5±0.4         | -               | -               | 8.7±1.3        | -       | -       | -      | -     |
| 59                                                                                                      | -                             | -               | -               | 2.3±0.3         | -               | -               | 4.9±0.3        | -       | -       | -      | -     |
| 60                                                                                                      | -                             | -               | -               | 1.3±0.4         | -               | -               | 7.8±1.6        | -       | -       | -      | -     |
| 61                                                                                                      | -                             | -               | -               | 5.6±1.0         | -               | -               | 2.4±0.5        | -       | -       | -      | -     |
| 62                                                                                                      | -                             | -               | -               | -               | -               | -               | 1.30±0.12      | -       | -       | -      | -     |
| 63                                                                                                      | -                             | -               | -               | -               | -               | -               | 0.89±0.24      | -       | -       | -      | -     |
| 64                                                                                                      | -                             | -               | -               | -               | -               | -               | 1.71±0.07      | -       | -       | -      | -     |
| 65                                                                                                      | -                             | -               | -               | -               | -               | -               | 0.32±0.02      | -       | -       | -      | -     |
| 66                                                                                                      | -                             | -               | -               | -               | -               | -               | 0.46±0.03      | -       | -       | -      | -     |
| 67                                                                                                      | -                             | -               | -               | -               | -               | -               | 0.97±0.17      | -       | -       | -      | -     |
| 68                                                                                                      | -                             | -               | -               | -               | -               | -               | 0.68±0.04      | -       | -       | -      | -     |
| 69                                                                                                      | -                             | -               | -               | -               | -               | -               | 0.60±0.04      | -       | -       | -      | -     |
| 70                                                                                                      | -                             | -               | -               | -               | -               | -               | 0.21±0.02      | -       | -       | -      | -     |
| 71                                                                                                      | -                             | -               | -               | -               | -               | -               | 0.31±0.05      | -       | -       | -      | -     |
| 72                                                                                                      | -                             | -               | -               | -               | -               | -               | 0.84±0.16      | -       | -       | -      | -     |
| 73                                                                                                      | -                             | -               | -               | -               | -               | -               | 0.68±0.04      | -       | -       | -      | -     |

|     |   |   |   |   |   |   |           |   |   |   |   |
|-----|---|---|---|---|---|---|-----------|---|---|---|---|
| 74  | - | - | - | - | - | - | 1.23±0.17 | - | - | - | - |
| 75  | - | - | - | - | - | - | 0.39±0.01 | - | - | - | - |
| 76  | - | - | - | - | - | - | 0.29±0.09 | - | - | - | - |
| 77  | - | - | - | - | - | - | 0.88±0.09 | - | - | - | - |
| 78  | - | - | - | - | - | - | 3.55±0.19 | - | - | - | - |
| 79  | - | - | - | - | - | - | 0.92±0.13 | - | - | - | - |
| 80  | - | - | - | - | - | - | 0.19±0.02 | - | - | - | - |
| 81  | - | - | - | - | - | - | 0.36±0.06 | - | - | - | - |
| 82  | - | - | - | - | - | - | 3.13±0.30 | - | - | - | - |
| 83  | - | - | - | - | - | - | 1.09±0.13 | - | - | - | - |
| 84  | - | - | - | - | - | - | 2.8±0.5   | - | - | - | - |
| 85  | - | - | - | - | - | - | 1.7±0.2   | - | - | - | - |
| 86  | - | - | - | - | - | - | 1.9±0.7   | - | - | - | - |
| 87  | - | - | - | - | - | - | 1.4±1.0   | - | - | - | - |
| 88  | - | - | - | - | - | - | 2.2±1.5   | - | - | - | - |
| 89  | - | - | - | - | - | - | 16.1±1.5  | - | - | - | - |
| 90  | - | - | - | - | - | - | 1.4±1.0   | - | - | - | - |
| 91  | - | - | - | - | - | - | 2.1±1.3   | - | - | - | - |
| 92  | - | - | - | - | - | - | 14.3±3.2  | - | - | - | - |
| 93  | - | - | - | - | - | - | 11.4±1.5  | - | - | - | - |
| 94  | - | - | - | - | - | - | 5.0±0.6   | - | - | - | - |
| 95  | - | - | - | - | - | - | 11.5±0.4  | - | - | - | - |
| 96  | - | - | - | - | - | - | 2.18±0.13 | - | - | - | - |
| 97  | - | - | - | - | - | - | >20       | - | - | - | - |
| 98  | - | - | - | - | - | - | 2.99±0.14 | - | - | - | - |
| 99  | - | - | - | - | - | - | 1.30±0.17 | - | - | - | - |
| 100 | - | - | - | - | - | - | 2.98±0.40 | - | - | - | - |
| 101 | - | - | - | - | - | - | 2.82±0.19 | - | - | - | - |
| 102 | - | - | - | - | - | - | >20       | - | - | - | - |

|     |   |   |   |   |   |   |                 |   |   |   |   |
|-----|---|---|---|---|---|---|-----------------|---|---|---|---|
| 103 | - | - | - | - | - | - | 1.74±0.04       | - | - | - | - |
| 104 | - | - | - | - | - | - | 2.94±0.16       | - | - | - | - |
| 105 | - | - | - | - | - | - | 2.39±0.28       | - | - | - | - |
| 106 | - | - | - | - | - | - | 1.87±0.10       | - | - | - | - |
| 107 | - | - | - | - | - | - | 2.95±0.20       | - | - | - | - |
| 108 | - | - | - | - | - | - | 4.93±0.53       | - | - | - | - |
| 109 | - | - | - | - | - | - | 2.80±0.16       | - | - | - | - |
| 110 | - | - | - | - | - | - | 15.3±3.5        | - | - | - | - |
| 111 | - | - | - | - | - | - | 2.48±0.07       | - | - | - | - |
| 112 | - | - | - | - | - | - | 2.18±0.14       | - | - | - | - |
| 113 | - | - | - | - | - | - | 6.61±0.29       | - | - | - | - |
| 114 | - | - | - | - | - | - | 3.15±0.20       | - | - | - | - |
| 115 | - | - | - | - | - | - | 3.04±0.32       | - | - | - | - |
| 116 | - | - | - | - | - | - | 0.982±<br>0.149 | - | - | - | - |
| 117 | - | - | - | - | - | - | 0.767±<br>0.011 | - | - | - | - |
| 118 | - | - | - | - | - | - | 1.86±0.16       | - | - | - | - |
| 119 | - | - | - | - | - | - | >20             | - | - | - | - |
| 120 | - | - | - | - | - | - | 17.4±6.4        | - | - | - | - |
| 121 | - | - | - | - | - | - | 1.23±0.06       | - | - | - | - |
| 122 | - | - | - | - | - | - | 1.12±0.11       | - | - | - | - |
| 123 | - | - | - | - | - | - | 0.971±<br>0.084 | - | - | - | - |
| 124 | - | - | - | - | - | - | 1.08±0.07       | - | - | - | - |
| 125 | - | - | - | - | - | - | 2.01±0.09       | - | - | - | - |
| 126 | - | - | - | - | - | - | >20             | - | - | - | - |
| 127 | - | - | - | - | - | - | 0.600±<br>0.010 | - | - | - | - |
| 128 | - | - | - | - | - | - | >20             | - | - | - | - |
| 129 | - | - | - | - | - | - | 3.32±0.18       | - | - | - | - |

|     |   |   |   |           |   |   |           |     |                |   |                |
|-----|---|---|---|-----------|---|---|-----------|-----|----------------|---|----------------|
| 130 | - | - | - | -         | - | - | 3.37±0.05 | -   | -              | - | -              |
| 131 | - | - | - | -         | - | - | 10.6±0.6  | -   | -              | - | -              |
| 132 | - | - | - | 4.08±0.29 | - | - | -         | -   | -              | - | -              |
| 133 | - | - | - | 2.13±0.47 | - | - | -         | -   | -              | - | -              |
| 134 | - | - | - | 2.83±0.30 | - | - | -         | -   | -              | - | -              |
| 135 | - | - | - | 0.88±0.02 | - | - | -         | -   | -              | - | -              |
| 136 | - | - | - | 1.55±0.36 | - | - | -         | -   | -              | - | -              |
| 137 | - | - | - | 2.72±0.54 | - | - | -         | -   | -              | - | -              |
| 138 | - | - | - | -         | - | - | -         | 5.7 | -              | - | -              |
| 140 | - | - | - | -         | - | - | -         | -   | 14.56±<br>1.08 | - | 11.82±<br>1.17 |
| 141 | - | - | - | -         | - | - | -         | -   | 6.28±0.79      | - | 4.06±1.21      |
| 142 | - | - | - | 1.42±0.15 | - | - | -         | -   | -              | - | -              |
| 143 | - | - | - | 4.10±0.25 | - | - | -         | -   | -              | - | -              |
| 144 | - | - | - | >10       | - | - | -         | -   | -              | - | -              |
| 145 | - | - | - | 7.63±0.45 | - | - | -         | -   | -              | - | -              |
| 146 | - | - | - | 7.13±0.33 | - | - | -         | -   | -              | - | -              |
| 147 | - | - | - | 6.87±0.26 | - | - | -         | -   | -              | - | -              |
| 148 | - | - | - | 7.11±0.40 | - | - | -         | -   | -              | - | -              |
| 149 | - | - | - | 6.67±0.25 | - | - | -         | -   | -              | - | -              |
| 150 | - | - | - | 7.82±0.35 | - | - | -         | -   | -              | - | -              |
| 151 | - | - | - | >10       | - | - | -         | -   | -              | - | -              |
| 152 | - | - | - | 4.74±0.19 | - | - | -         | -   | -              | - | -              |
| 153 | - | - | - | 7.68±0.32 | - | - | -         | -   | -              | - | -              |
| 154 | - | - | - | 6.66±0.27 | - | - | -         | -   | -              | - | -              |
| 155 | - | - | - | 7.62±0.36 | - | - | -         | -   | -              | - | -              |
| 156 | - | - | - | 7.11±0.47 | - | - | -         | -   | -              | - | -              |
| 157 | - | - | - | 7.23±0.38 | - | - | -         | -   | -              | - | -              |
| 158 | - | - | - | 7.67±0.39 | - | - | -         | -   | -              | - | -              |
| 159 | - | - | - | 8.91±0.52 | - | - | -         | -   | -              | - | -              |

|     |   |                 |   |           |   |   |   |   |   |   |           |
|-----|---|-----------------|---|-----------|---|---|---|---|---|---|-----------|
| 160 | - | -               | - | 7.62±0.30 | - | - | - | - | - | - | -         |
| 161 | - | -               | - | 2.75±0.26 | - | - | - | - | - | - | -         |
| 162 | - | -               | - | 4.39±0.26 | - | - | - | - | - | - | 5.13±0.31 |
| 163 | - | -               | - | 3.44±0.19 | - | - | - | - | - | - | 4.64±0.23 |
| 164 | - | -               | - | >10       | - | - | - | - | - | - | >10       |
| 165 | - | -               | - | >10       | - | - | - | - | - | - | >10       |
| 166 | - | -               | - | 6.13±0.32 | - | - | - | - | - | - | 7.61±0.49 |
| 167 | - | -               | - | 6.39±0.41 | - | - | - | - | - | - | >10       |
| 168 | - | -               | - | 5.09±0.26 | - | - | - | - | - | - | 7.68±0.30 |
| 169 | - | -               | - | 6.63±0.30 | - | - | - | - | - | - | 7.11±0.34 |
| 170 | - | -               | - | 4.99±0.20 | - | - | - | - | - | - | 6.06±0.28 |
| 171 | - | -               | - | 6.91±0.44 | - | - | - | - | - | - | 6.49±0.35 |
| 172 | - | -               | - | >10       | - | - | - | - | - | - | 7.33±0.42 |
| 173 | - | -               | - | 5.30±0.25 | - | - | - | - | - | - | 5.66±0.34 |
| 174 | - | -               | - | 5.11±0.41 | - | - | - | - | - | - | 6.16±0.37 |
| 175 | - | -               | - | 5.62±0.35 | - | - | - | - | - | - | 6.01±0.42 |
| 176 | - | -               | - | >10       | - | - | - | - | - | - | 7.62±0.36 |
| 177 | - | -               | - | 8.89±0.42 | - | - | - | - | - | - | 7.03±0.37 |
| 179 | - | 0.35±0.26       | - | -         | - | - | - | - | - | - | -         |
| 180 | - | 5.8±5.0         | - | -         | - | - | - | - | - | - | -         |
| 181 | - | 16±2            | - | -         | - | - | - | - | - | - | -         |
| 182 | - | 7.2±0.1         | - | -         | - | - | - | - | - | - | -         |
| 183 | - | 0.22±0.09       | - | -         | - | - | - | - | - | - | -         |
| 184 | - | 0.013±0.004     | - | -         | - | - | - | - | - | - | -         |
| 185 | - | 0.0039 ± 0.0033 | - | -         | - | - | - | - | - | - | -         |
| 186 | - | 4.4±0.2         | - | -         | - | - | - | - | - | - | -         |
| 187 | - | 0.017±          | - | -         | - | - | - | - | - | - | -         |

|     |                |       |   |      |   |   |   |   |   |           |   |
|-----|----------------|-------|---|------|---|---|---|---|---|-----------|---|
|     |                | 0.001 |   |      |   |   |   |   |   |           |   |
| 188 | 0.5            | 0.4   | - | 0.6  | - | - | - | - | - | 0.65±0.16 | - |
| 189 | 0.25           | 0.2   | - | 0.25 | - | - | - | - | - | 0.25±0.03 | - |
| 190 | 3.29±0.74      | -     | - | -    | - | - | - | - | - | -         | - |
| 191 | 3.13±0.03      | -     | - | -    | - | - | - | - | - | -         | - |
| 192 | 16.52±<br>0.96 | -     | - | -    | - | - | - | - | - | -         | - |
| 193 | >20            | -     | - | -    | - | - | - | - | - | -         | - |
| 194 | 9.06±0.04      | -     | - | -    | - | - | - | - | - | -         | - |
| 195 | 8.99±0.65      | -     | - | -    | - | - | - | - | - | -         | - |
| 196 | 9.48±0.07      | -     | - | -    | - | - | - | - | - | -         | - |
| 197 | 8.21±0.67      | -     | - | -    | - | - | - | - | - | -         | - |
| 198 | 12.08±<br>0.29 | -     | - | -    | - | - | - | - | - | -         | - |
| 199 | >20            | -     | - | -    | - | - | - | - | - | -         | - |
| 200 | 19.09±<br>0.63 | -     | - | -    | - | - | - | - | - | -         | - |
| 201 | 5.36±0.02      | -     | - | -    | - | - | - | - | - | -         | - |
| 202 | 7.42±0.44      | -     | - | -    | - | - | - | - | - | -         | - |
| 203 | 5.32±0.01      | -     | - | -    | - | - | - | - | - | -         | - |
| 204 | >20            | -     | - | -    | - | - | - | - | - | -         | - |
| 205 | 9.12±0.30      | -     | - | -    | - | - | - | - | - | -         | - |
| 206 | 18.68±<br>0.13 | -     | - | -    | - | - | - | - | - | -         | - |
| 207 | >20            | -     | - | -    | - | - | - | - | - | -         | - |
| 208 | >20            | -     | - | -    | - | - | - | - | - | -         | - |
| 209 | >20            | -     | - | -    | - | - | - | - | - | -         | - |
| 210 | 19.08±<br>0.85 | -     | - | -    | - | - | - | - | - | -         | - |
| 211 | >20            | -     | - | -    | - | - | - | - | - | -         | - |
| 212 | >20            | -     | - | -    | - | - | - | - | - | -         | - |

|     |                |                |   |                |   |   |   |   |   |   |         |
|-----|----------------|----------------|---|----------------|---|---|---|---|---|---|---------|
| 214 | 3.70±0.11      | -              | - | -              | - | - | - | - | - | - | -       |
| 215 | 12.49±<br>0.10 | 11.70±<br>0.01 | - | 8.42±0.21      | - | - | - | - | - | - | -       |
| 216 | 17.68±<br>0.27 | 14.82±<br>0.08 | - | 9.68±0.05      | - | - | - | - | - | - | -       |
| 217 | 8.10±0.17      | 8.91±0.07      | - | 5.22±0.19      | - | - | - | - | - | - | -       |
| 218 | 11.36±<br>0.22 | 11.59±<br>0.13 | - | 8.32±0.03      | - | - | - | - | - | - | -       |
| 219 | 13.66±<br>0.32 | 13.9±0.12      | - | 8.91±0.04      | - | - | - | - | - | - | -       |
| 220 | 8.67±0.13      | 8.56±0.05      | - | 7.54±0.05      | - | - | - | - | - | - | -       |
| 221 | 6.61±0.13      | 5.29±0.04      | - | 4.58±0.43      | - | - | - | - | - | - | -       |
| 222 | 9.66±0.05      | 11.11±<br>0.42 | - | 8.14±0.15      | - | - | - | - | - | - | -       |
| 223 | 8.17±0.03      | 9.13±0.17      | - | 6.71±0.15      | - | - | - | - | - | - | -       |
| 224 | 10.33±<br>0.09 | 17.17±0.0<br>3 | - | 13.20±<br>0.07 | - | - | - | - | - | - | -       |
| 225 | 7.27±0.32      | 10.41±<br>0.09 | - | 4.82±0.13      | - | - | - | - | - | - | -       |
| 226 | 5.84±0.18      | 4.53±0.07      | - | 2.36±0.32      | - | - | - | - | - | - | -       |
| 227 | 21.21±<br>0.07 | 14.82±<br>0.08 | - | 15.47±<br>0.18 | - | - | - | - | - | - | -       |
| 228 | 20.66±<br>0.01 | 17.39±<br>0.21 | - | 12.55±<br>0.11 | - | - | - | - | - | - | -       |
| 229 | 16.71±<br>0.44 | 14.57±<br>0.23 | - | 9.18±0.25      | - | - | - | - | - | - | -       |
| 230 | 6.81±0.14      | 17.37±<br>0.01 | - | 11.58±<br>0.26 | - | - | - | - | - | - | -       |
| 231 | 9.51±0.18      | 16.17±<br>0.23 | - | 9.48±0.02      | - | - | - | - | - | - | -       |
| 232 | 12.51±<br>0.47 | 14.17±<br>0.11 | - | 10.48±<br>0.22 | - | - | - | - | - | - | -       |
| 233 | -              | -              | - | -              | - | - | - | - | - | - | 0.9±0.1 |

**Abbreviations:**

A549= non-small-cell-lung cancer cell line

HeLa= human epithelial cervical cancer cell line

Bel-7402= human liver carcinoma cell line

MCF-7= human breast carcinoma cell line

HCT-8= human ileocecum carcinoma cell lines

H460-MX20=human non-small cell lung cancer (NSCLC) cell lines

BCRP/ABCG2= Breast cancer resistance protein / ATP-binding cassette subfamily G member 2

MV-4-11= leukemia cell lines dependent on FLT3-ITD

SK-OV-3=Human Ovarian Cancer Cell Line

KB-C2= an isogenic MDR1-overexpressing drug resistant cell line

MDR1= Multidrug Resistance Protein 1

HepG2= liver cancer cells

The most active 2 compounds for ABCG2 mechanism are written in purple (Compounds 41 and 80).

The most active 2 compounds for tubulin mechanism are written in red (Compounds 8 and 185).
